# Supplementary material for: Energetics and kinetics of various cyano radical hydrogen abstractions
Source: Royal Society of Chemistry journal article supplement (doi:10.1039/d0cp06228f), 2021-01-01
Supplement: d0cp06228f1.pdf [file d0cp06228f1.pdf]

# Energetics and Kinetics of Various Cyano Radical Hydrogen Abstractions Supplementary Information:

Alexandra D. Burke

Michael C. Bowman

Justin M. Turney

Henry F. Schaefer III

Center for Computational Quantum Chemistry

University of Georgia

Athens, GA, USA 30602

# Contents

|          |                                                             |            |
|----------|-------------------------------------------------------------|------------|
| <b>1</b> | <b>Reactants</b>                                            | <b>S4</b>  |
| 1.1      | CN ( $^2\Sigma^+$ )                                         | S4         |
| 1.2      | H <sub>2</sub>                                              | S5         |
| 1.3      | CH <sub>4</sub>                                             | S6         |
| 1.4      | NH <sub>3</sub>                                             | S7         |
| 1.5      | H <sub>2</sub> O                                            | S8         |
| 1.6      | HF                                                          | S9         |
| 1.7      | HCl                                                         | S10        |
| 1.8      | C <sub>2</sub> H <sub>2</sub>                               | S11        |
| 1.9      | SiH <sub>4</sub>                                            | S12        |
| 1.10     | PH <sub>3</sub>                                             | S13        |
| 1.11     | H <sub>2</sub> S                                            | S14        |
| 1.12     | HCN                                                         | S15        |
| 1.13     | HNC                                                         | S16        |
| <b>2</b> | <b>Products</b>                                             | <b>S17</b> |
| 2.1      | CH <sub>3</sub> ( $^2A''$ )                                 | S17        |
| 2.2      | NH <sub>2</sub> ( $^2B_1$ )                                 | S18        |
| 2.3      | OH ( $^2\Pi$ )                                              | S19        |
| 2.4      | SiH <sub>3</sub> ( $^2A_1$ )                                | S20        |
| 2.5      | PH <sub>2</sub> ( $^2B_1$ )                                 | S21        |
| 2.6      | SH ( $^2\Pi$ )                                              | S22        |
| 2.7      | C <sub>2</sub> H ( $^2\Sigma^+$ )                           | S23        |
| <b>3</b> | <b>Pre-Reactive Complexes</b>                               | <b>S24</b> |
| 3.1      | CN + H <sub>2</sub> → HCN + H                               | S24        |
| 3.2      | CN + H <sub>2</sub> → HNC + H                               | S25        |
| <b>4</b> | <b>Transition States</b>                                    | <b>S26</b> |
| 4.1      | CN + H <sub>2</sub> → HCN + H                               | S26        |
| 4.2      | CN + H <sub>2</sub> → HNC + H                               | S27        |
| 4.3      | CN + CH <sub>4</sub> → HCN + CH <sub>3</sub>                | S28        |
| 4.4      | CN + CH <sub>4</sub> → HNC + CH <sub>3</sub>                | S29        |
| 4.5      | CN + NH <sub>3</sub> → HCN + NH <sub>2</sub>                | S30        |
| 4.6      | CN + NH <sub>3</sub> → HNC + NH <sub>2</sub>                | S31        |
| 4.7      | CN + H <sub>2</sub> O → HCN + OH                            | S32        |
| 4.8      | CN + H <sub>2</sub> O → HNC + OH                            | S33        |
| 4.9      | CN + HF → HCN + F                                           | S34        |
| 4.10     | CN + HF → HNC + F                                           | S35        |
| 4.11     | CN + HCl → HCN + Cl                                         | S36        |
| 4.12     | CN + HCl → HNC + Cl                                         | S37        |
| 4.13     | CN + C <sub>2</sub> H <sub>2</sub> → HCN + C <sub>2</sub> H | S38        |
| 4.14     | CN + C <sub>2</sub> H <sub>2</sub> → HNC + C <sub>2</sub> H | S39        |
| 4.15     | CN + SiH <sub>4</sub> → HCN + SiH <sub>3</sub>              | S40        |
| 4.16     | CN + SiH <sub>4</sub> → HNC + SiH <sub>3</sub>              | S41        |
| 4.17     | CN + PH <sub>3</sub> → HCN + PH <sub>2</sub>                | S42        |

|      |                                                                     |     |
|------|---------------------------------------------------------------------|-----|
| 4.18 | $\text{CN} + \text{PH}_3 \rightarrow \text{HNC} + \text{PH}_2$      | S43 |
| 4.19 | $\text{CN} + \text{H}_2\text{S} \rightarrow \text{HCN} + \text{SH}$ | S44 |
| 4.20 | $\text{CN} + \text{H}_2\text{S} \rightarrow \text{HNC} + \text{SH}$ | S45 |
| 4.21 | $\text{CN} + \text{HCN} \rightarrow \text{HCN} + \text{CN}$         | S46 |
| 4.22 | $\text{CN} + \text{HCN} \rightarrow \text{HNC} + \text{CN}$         | S47 |
| 4.23 | $\text{CN} + \text{HNC} \rightarrow \text{HCN} + \text{CN}$         | S48 |
| 4.24 | $\text{CN} + \text{HNC} \rightarrow \text{HNC} + \text{CN}$         | S49 |

# 1 Reactants

## 1.1 CN ( $^2\Sigma^+$ )

### Level of Theory:

Reference: ROHF

Geometry: CCSD(T)-F12a/aug-cc-pVTZ

Frequencies: CCSD(T)-F12a/aug-cc-pVTZ

Program: MOLPRO 2010.1

### Wavefunction Diagnostics:

$T_1$ : 0.044

$D_1$ : 0.150

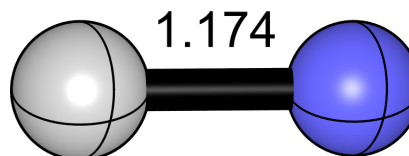

Figure S1: CN

### Cartesian Coordinates (Å):

|   |              |              |               |
|---|--------------|--------------|---------------|
| C | 0.0000000000 | 0.0000000000 | -0.6319747809 |
| N | 0.0000000000 | 0.0000000000 | 0.5419298688  |

Rotational Constants (GHz): 56.7159810, 56.7159810

### Harmonic Vibrational Frequencies ( $\text{cm}^{-1}$ ):

$\nu_1$ : 2071

## 1.2 H<sub>2</sub>

### Level of Theory:

Reference: ROHF

Geometry: CCSD(T)-F12a/aug-cc-pVTZ

Frequencies: CCSD(T)-F12a/aug-cc-pVTZ

Program: MOLPRO 2010.1

### Wavefunction Diagnostics:

$T_1$ : 0.005

$D_1$ : 0.008

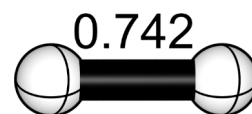

Figure S2: H<sub>2</sub>

### Cartesian Coordinates (Å):

|   |              |              |               |
|---|--------------|--------------|---------------|
| H | 0.0000000000 | 0.0000000000 | -0.3709824635 |
| H | 0.0000000000 | 0.0000000000 | 0.3709824635  |

Rotational Constants (GHz): 1821.5695094,1821.5695094

### Harmonic Vibrational Frequencies (cm<sup>-1</sup>):

$\sigma_g^+$ : 4401

### 1.3 CH<sub>4</sub>

#### Level of Theory:

Reference: ROHF

Geometry: CCSD(T)-F12a/aug-cc-pVTZ

Frequencies: CCSD(T)-F12a/aug-cc-pVTZ

Program: MOLPRO 2010.1

#### Wavefunction Diagnostics:

$T_1$ : 0.008

$D_1$ : 0.014

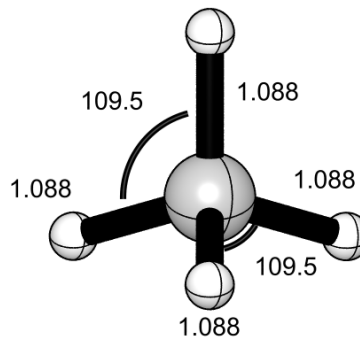

Figure S3: CH<sub>4</sub>

#### Cartesian Coordinates (Å):

|   |               |               |               |
|---|---------------|---------------|---------------|
| C | -0.0000000000 | -0.0000000000 | 0.0000002049  |
| H | -0.0002218767 | 0.0000000000  | 1.0878996099  |
| H | 0.5681112097  | 0.8540231244  | -0.3625181658 |
| H | 0.4556610391  | -0.9189462619 | -0.3625411001 |
| H | -1.0235503716 | 0.0649231378  | -0.3628427853 |

Rotational Constants (GHz): 158.8678663, 158.8678664, 158.8680262

#### Harmonic Vibrational Frequencies (cm<sup>-1</sup>):

|         |           |
|---------|-----------|
| $a_1$ : | 3034      |
| $e$ :   | 1570      |
| $t_2$ : | 3156 1346 |

## 1.4 NH<sub>3</sub>

### Level of Theory:

Reference: ROHF

Geometry: CCSD(T)-F12a/aug-cc-pVTZ

Frequencies: CCSD(T)-F12a/aug-cc-pVTZ

Program: MOLPRO 2010.1

### Wavefunction Diagnostics:

$T_1$ : 0.008

$D_1$ : 0.017

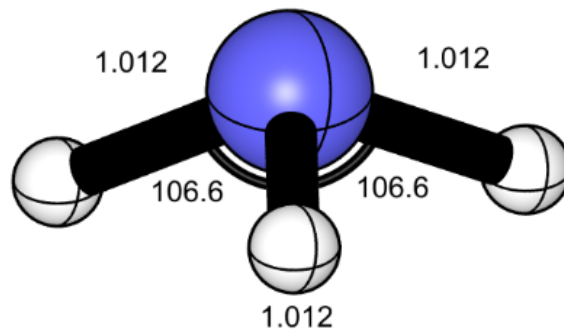

Figure S4: NH<sub>3</sub>

### Cartesian Coordinates (Å):

|   |               |               |               |
|---|---------------|---------------|---------------|
| N | -0.0000004029 | -0.0679223550 | -0.0000000000 |
| H | 0.9373304824  | 0.3146230410  | 0.0000390111  |
| H | -0.4686962260 | 0.3146253261  | 0.8117335062  |
| H | -0.4686286573 | 0.3146253262  | -0.8117725167 |

Rotational Constants (GHz): 298.5712125, 190.2256925, 298.5726454

### Harmonic Vibrational Frequencies (cm<sup>-1</sup>):

$a_1$ : 3478 1056

$e$ : 3609 1674

## 1.5 H<sub>2</sub>O

### Level of Theory:

Reference: ROHF

Geometry: CCSD(T)-F12a/aug-cc-pVTZ

Frequencies: CCSD(T)-F12a/aug-cc-pVTZ

Program: MOLPRO 2010.1

### Wavefunction Diagnostics:

$T_1$ : 0.009

$D_1$ : 0.020

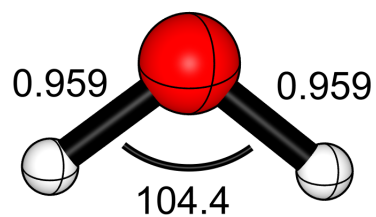

Figure S5: H<sub>2</sub>O

### Cartesian Coordinates (Å):

|   |              |               |               |
|---|--------------|---------------|---------------|
| O | 0.0000000000 | -0.0657136648 | 0.0000000012  |
| H | 0.0000000000 | 0.5215485163  | 0.7576575163  |
| H | 0.0000000000 | 0.5215485019  | -0.7576575348 |

Rotational Constants (GHz): 284.7781691, 436.7235659, 818.5133614

### Harmonic Vibrational Frequencies (cm<sup>-1</sup>):

$a_1$ : 3834 1648

$b_2$ : 3944



## 1.6 HF

### Level of Theory:

Reference: ROHF

Geometry: CCSD(T)-F12a/aug-cc-pVTZ

Frequencies: CCSD(T)-F12a/aug-cc-pVTZ

Program: MOLPRO 2010.1

### Wavefunction Diagnostics:

$T_1$ : 0.009

$D_1$ : 0.017

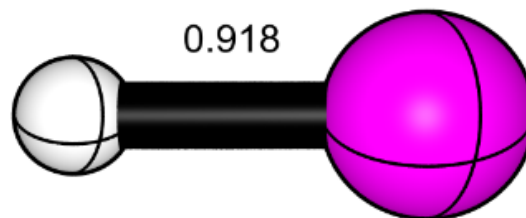

Figure S6: HF

### Cartesian Coordinates (Å):

|   |              |              |               |
|---|--------------|--------------|---------------|
| H | 0.0000000000 | 0.0000000000 | -0.8713491845 |
| F | 0.0000000000 | 0.0000000000 | 0.0462285013  |

Rotational Constants (GHz): 627.1153524, 627.1153524

### Harmonic Vibrational Frequencies ( $\text{cm}^{-1}$ ):

$\sigma^+$ : 4143

## 1.7 HCl

### Level of Theory:

Reference: ROHF

Geometry: CCSD(T)-F12a/aug-cc-pVTZ

Frequencies: CCSD(T)-F12a/aug-cc-pVTZ

Program: MOLPRO 2010.1

### Wavefunction Diagnostics:

$T_1$ : 0.005

$D_1$ : 0.013

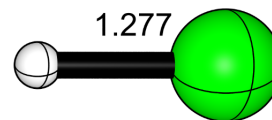

Figure S7: HCl

### Cartesian Coordinates (Å):

|    |              |              |               |
|----|--------------|--------------|---------------|
| H  | 0.0000000000 | 0.0000000000 | -1.2414626581 |
| Cl | 0.0000000000 | 0.0000000000 | 0.0352951759  |

Rotational Constants (GHz): 316.3299504, 316.3299504

### Harmonic Vibrational Frequencies ( $\text{cm}^{-1}$ ):

$\sigma^+$ : 2994

## 1.8 C<sub>2</sub>H<sub>2</sub>

### Level of Theory:

Reference: ROHF  
Geometry: CCSD(T)-F12a/aug-cc-pVTZ  
Frequencies: CCSD(T)-F12a/aug-cc-pVTZ  
Program: MOLPRO 2010.1

### Wavefunction Diagnostics:

$T_1$ : 0.012  
 $D_1$ : 0.030

### Cartesian Coordinates (Å):

|   |              |              |               |
|---|--------------|--------------|---------------|
| C | 0.0000000000 | 0.0000000000 | -0.6029509599 |
| C | 0.0000000000 | 0.0000000000 | 0.6029509598  |
| H | 0.0000000000 | 0.0000000000 | -1.6662535492 |
| H | 0.0000000000 | 0.0000000000 | 1.6662535502  |

Rotational Constants (GHz): 35.2669901, 35.2669901

### Harmonic Vibrational Frequencies (cm<sup>-1</sup>):

|                |      |      |      |
|----------------|------|------|------|
| $\sigma_g^+$ : | 3503 | 3409 | 2008 |
| $\sigma_u^+$ : |      | 753  | 615  |
| $\pi_u$ :      |      |      | 615  |

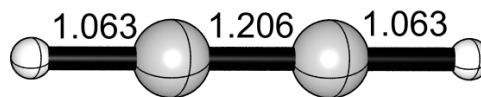

Figure S8: C<sub>2</sub>H<sub>2</sub>

## 1.9 SiH<sub>4</sub>

### Level of Theory:

Reference: ROHF

Geometry: CCSD(T)-F12a/aug-cc-pVTZ

Frequencies: CCSD(T)-F12a/aug-cc-pVTZ

Program: MOLPRO 2010.1

### Wavefunction Diagnostics:

$T_1$ : 0.009

$D_1$ : 0.019

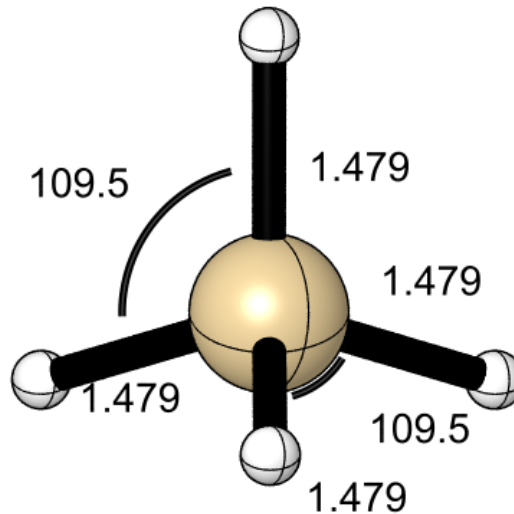

Figure S9: SiH<sub>4</sub>

### Cartesian Coordinates (Å):

|    |               |               |               |
|----|---------------|---------------|---------------|
| Si | -0.0000009937 | 0.0000000027  | 0.0000000012  |
| H  | -1.4791576341 | 0.0023349088  | -0.0000000000 |
| H  | 0.4908623041  | -1.3941102821 | 0.0584932404  |
| H  | 0.4940815371  | 0.6452310537  | -1.2359090023 |
| H  | 0.4942414807  | 0.7465442442  | 1.1774157281  |

Rotational Constants (GHz): 85.9382004, 85.9375520, 85.9375533

### Harmonic Vibrational Frequencies (cm<sup>-1</sup>):

|         |          |
|---------|----------|
| $a_1$ : | 2260     |
| $e$ :   | 982      |
| $t_2$ : | 2264 930 |

## 1.10 PH<sub>3</sub>

### Level of Theory:

Reference: ROHF

Geometry: CCSD(T)-F12a/aug-cc-pVTZ

Frequencies: CCSD(T)-F12a/aug-cc-pVTZ

Program: MOLPRO 2010.1

### Wavefunction Diagnostics:

$T_1$ : 0.010

$D_1$ : 0.024

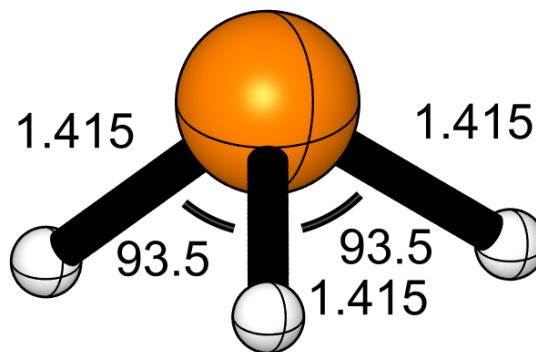

Figure S10: PH<sub>3</sub>

### Cartesian Coordinates (Å):

|   |               |               |               |
|---|---------------|---------------|---------------|
| P | 0.0000000411  | -0.0680918703 | -0.0000000155 |
| H | 1.1823453802  | 0.6974829675  | -0.1383938055 |
| H | -0.4713206072 | 0.6974820049  | 1.0931384206  |
| H | -0.7110260354 | 0.6974822462  | -0.9547441401 |

Rotational Constants (GHz): 134.5108534, 117.9403831, 134.5108205

### Harmonic Vibrational Frequencies (cm<sup>-1</sup>):

$a_1$ : 2420 1013

$e$ : 2428 1143

## 1.11 H<sub>2</sub>S

### Level of Theory:

Reference: ROHF

Geometry: CCSD(T)-F12a/aug-cc-pVTZ

Frequencies: CCSD(T)-F12a/aug-cc-pVTZ

Program: MOLPRO 2010.1

### Wavefunction Diagnostics:

$T_1$ : 0.008

$D_1$ : 0.019

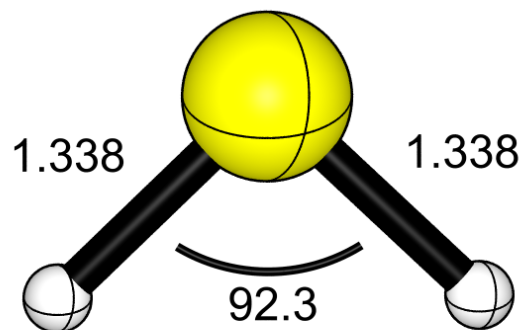

Figure S11: H<sub>2</sub>S

### Cartesian Coordinates (Å):

|   |              |               |               |
|---|--------------|---------------|---------------|
| S | 0.0000000000 | -0.0548731756 | -0.0000000001 |
| H | 0.0000000000 | 0.8726878618  | 0.9652217398  |
| H | 0.0000000000 | 0.8726878649  | -0.9652217365 |

Rotational Constants (GHz): 143.9868205, 269.0904726, 309.7070385

### Harmonic Vibrational Frequencies (cm<sup>-1</sup>):

$a_1$ : 2721 1213

$b_2$ : 2737

## 1.12 HCN

### Level of Theory:

Reference: ROHF  
Geometry: CCSD(T)-F12a/aug-cc-pVTZ  
Frequencies: CCSD(T)-F12a/aug-cc-pVTZ  
Program: MOLPRO 2010.1

### Wavefunction Diagnostics:

$T_1$ : 0.013

$D_1$ : 0.030

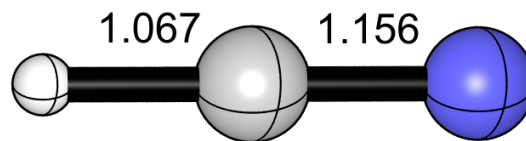

Figure S12: HCN

### Cartesian Coordinates (Å):

|   |              |              |               |
|---|--------------|--------------|---------------|
| C | 0.0000000000 | 0.0000000000 | 0.5591863743  |
| H | 0.0000000000 | 0.0000000000 | 1.6259526769  |
| N | 0.0000000000 | 0.0000000000 | -0.5965181151 |

Rotational Constants (GHz): 44.3140612, 44.3140612

### Harmonic Vibrational Frequencies ( $\text{cm}^{-1}$ ):

$\sigma^+$ : 3437 2125

$\pi$ : 729

### 1.13 HNC

#### Level of Theory:

Reference: ROHF

Geometry: CCSD(T)-F12a/aug-cc-pVTZ

Frequencies: CCSD(T)-F12a/aug-cc-pVTZ

Program: MOLPRO 2010.1

#### Wavefunction Diagnostics:

$T_1$ : 0.014

$D_1$ : 0.034

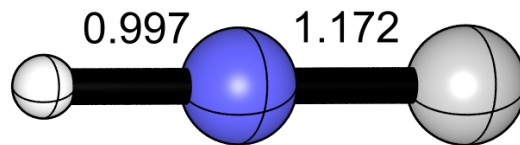

Figure S13: HNC

#### Cartesian Coordinates (Å):

|   |              |              |               |
|---|--------------|--------------|---------------|
| N | 0.0000000000 | 0.0000000000 | 0.4834305016  |
| H | 0.0000000000 | 0.0000000000 | 1.4800462604  |
| C | 0.0000000000 | 0.0000000000 | -0.6879580247 |

Rotational Constants (GHz): 45.2604925, 45.2604925

#### Harmonic Vibrational Frequencies ( $\text{cm}^{-1}$ ):

$\sigma^+$ : 3813 2053

$\pi$ : 465



## 2 Products

### 2.1 $\text{CH}_3$ ( $^2A_2''$ )

#### Level of Theory:

Reference: ROHF

Geometry: CCSD(T)-F12a/aug-cc-pVTZ

Frequencies: CCSD(T)-F12a/aug-cc-pVTZ

Program: MOLPRO 2010.1

#### Wavefunction Diagnostics:

$T_1$ : 0.006

$D_1$ : 0.011

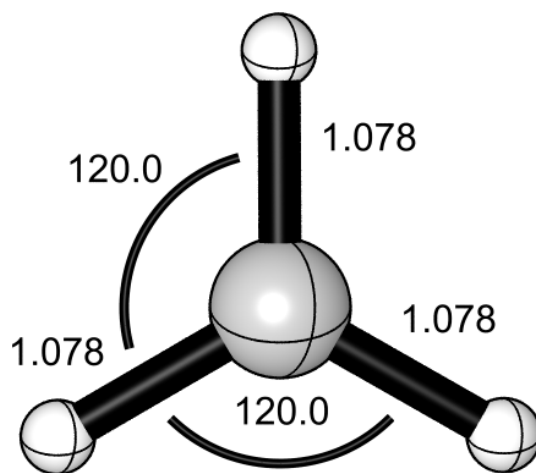

Figure S14:  $\text{CH}_3$

#### Cartesian Coordinates ( $\text{\AA}$ ):

|   |              |               |               |
|---|--------------|---------------|---------------|
| C | 0.0000000000 | -0.0000000000 | -0.0000000000 |
| H | 0.0000000000 | -1.0777093855 | 0.0000000000  |
| H | 0.0000000000 | 0.5388546928  | 0.9333237060  |
| H | 0.0000000000 | 0.5388546929  | -0.9333237058 |

Rotational Constants (GHz): 143.8990480, 287.7980960, 287.7980959

#### Harmonic Vibrational Frequencies ( $\text{cm}^{-1}$ ):

|           |           |
|-----------|-----------|
| $a_1'$ :  | 3120      |
| $e$ :     | 3304 1421 |
| $a_2''$ : | 518       |

## 2.2 NH<sub>2</sub> (<sup>2</sup>B<sub>1</sub>)

### Level of Theory:

Reference: ROHF

Geometry: CCSD(T)-F12a/aug-cc-pVTZ

Frequencies: CCSD(T)-F12a/aug-cc-pVTZ

Program: MOLPRO 2010.1

### Wavefunction Diagnostics:

$T_1$ : 0.007

$D_1$ : 0.014

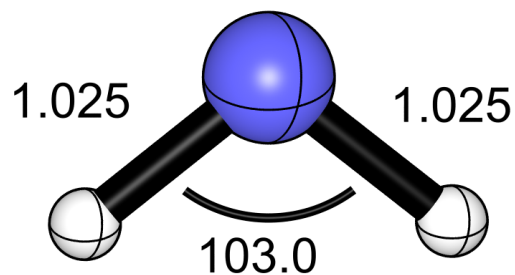

Figure S15: NH<sub>2</sub>

### Cartesian Coordinates (Å):

|   |              |               |               |
|---|--------------|---------------|---------------|
| N | 0.0000000000 | -0.0802397172 | -0.0000000000 |
| H | 0.0000000000 | 0.5575201136  | 0.8025151394  |
| H | 0.0000000000 | 0.5575201139  | -0.8025151391 |

Rotational Constants (GHz): 250.8006512, 389.2656141, 705.0741749

### Harmonic Vibrational Frequencies (cm<sup>-1</sup>):

|         |      |      |
|---------|------|------|
| $a_1$ : | 3375 | 1541 |
| $b_2$ : | 3470 |      |

## 2.3 OH ( $^2\Pi$ )

### Level of Theory:

Reference: ROHF

Geometry: CCSD(T)-F12a/aug-cc-pVTZ

Frequencies: CCSD(T)-F12a/aug-cc-pVTZ

Program: MOLPRO 2010.1

### Wavefunction Diagnostics:

$T_1$ : 0.008

$D_1$ : 0.017

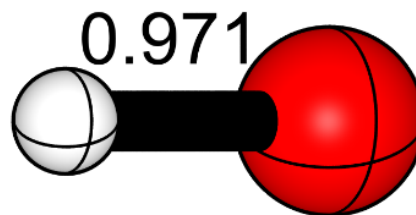

Figure S16: OH

### Cartesian Coordinates (Å):

|   |              |              |               |
|---|--------------|--------------|---------------|
| O | 0.0000000000 | 0.0000000000 | -0.0575165941 |
| H | 0.0000000000 | 0.0000000000 | 0.9129819196  |

Rotational Constants (GHz): 565.8814452, 565.8814452

### Harmonic Vibrational Frequencies ( $\text{cm}^{-1}$ ):

$\sigma^+$ : 3738

## 2.4 SiH<sub>3</sub> (<sup>2</sup>A<sub>1</sub>)

### Level of Theory:

Reference: ROHF

Geometry: CCSD(T)-F12a/aug-cc-pVTZ

Frequencies: CCSD(T)-F12a/aug-cc-pVTZ

Program: MOLPRO 2010.1

### Wavefunction Diagnostics:

$T_1$ : 0.013

$D_1$ : 0.035

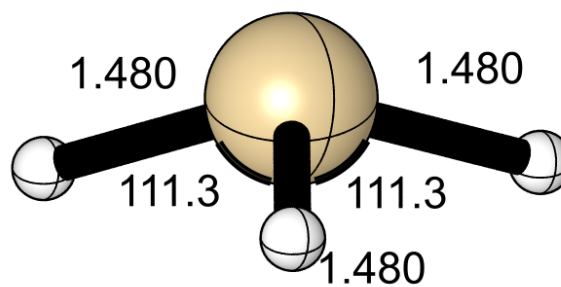

Figure S17: SiH<sub>3</sub>

### Cartesian Coordinates (Å):

|    |               |               |               |
|----|---------------|---------------|---------------|
| Si | 0.0000000003  | -0.0435800318 | 0.0000001886  |
| H  | -0.0006845217 | 0.4047739671  | -1.4106892395 |
| H  | 1.2220361900  | 0.4047756383  | 0.7047491830  |
| H  | -1.2213516767 | 0.4047756361  | 0.7059348018  |

Rotational Constants (GHz): 142.0588464, 83.9843854, 142.0583091

### Harmonic Vibrational Frequencies (cm<sup>-1</sup>):

$a_1$ : 2227 770

$e$ : 2261 939

## 2.5 PH<sub>2</sub> (<sup>2</sup>B<sub>1</sub>)

### Level of Theory:

Reference: ROHF

Geometry: CCSD(T)-F12a/aug-cc-pVTZ

Frequencies: CCSD(T)-F12a/aug-cc-pVTZ

Program: MOLPRO 2010.1

### Wavefunction Diagnostics:

$T_1$ : 0.009

$D_1$ : 0.022

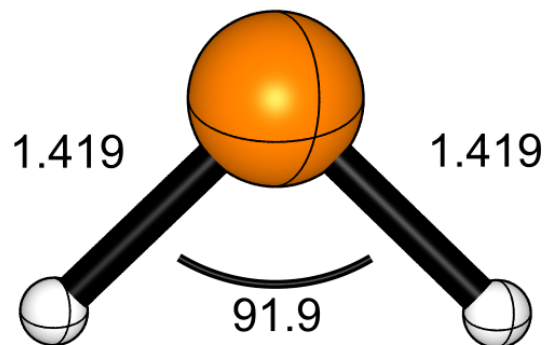

Figure S18: PH<sub>2</sub>

### Cartesian Coordinates (Å):

|   |              |               |               |
|---|--------------|---------------|---------------|
| P | 0.0000000000 | -0.0603505120 | -0.0000000001 |
| H | 0.0000000000 | 0.9272785444  | 1.0196157769  |
| H | 0.0000000000 | 0.9272785471  | -1.0196157741 |

Rotational Constants (GHz): 128.2069785, 241.1456418, 273.7464142

### Harmonic Vibrational Frequencies (cm<sup>-1</sup>):

$a_1$ : 2396 1128

$b_2$ : 2404

## 2.6 SH ( $^2\Pi$ )

### Level of Theory:

Reference: ROHF

Geometry: CCSD(T)-F12a/aug-cc-pVTZ

Frequencies: CCSD(T)-F12a/aug-cc-pVTZ

Program: MOLPRO 2010.1

### Wavefunction Diagnostics:

$T_1$ : 0.007

$D_1$ : 0.018

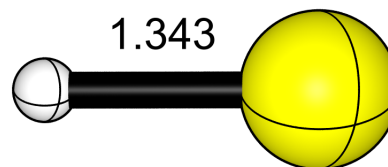

Figure S19: SH

### Cartesian Coordinates ( $\text{\AA}$ ):

|   |              |              |               |
|---|--------------|--------------|---------------|
| H | 0.0000000000 | 0.0000000000 | -1.3018375700 |
| S | 0.0000000000 | 0.0000000000 | 0.0409287010  |

Rotational Constants (GHz): 286.8305109, 286.8305109

### Harmonic Vibrational Frequencies ( $\text{cm}^{-1}$ ):

$\sigma^+$ : 2700

## 2.7 C<sub>2</sub>H (<sup>2</sup>Σ<sup>+</sup>)

### Level of Theory:

Reference: ROHF

Geometry: CCSD(T)-F12a/aug-cc-pVTZ

Frequencies: CCSD(T)-F12a/aug-cc-pVTZ

Program: MOLPRO 2010.1

### Wavefunction Diagnostics:

$T_1$ : 0.014

$D_1$ : 0.032

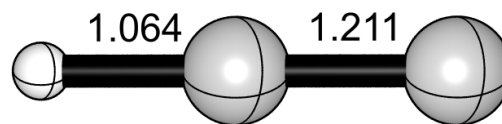

Figure S20: C<sub>2</sub>H

### Cartesian Coordinates (Å):

|   |              |              |               |
|---|--------------|--------------|---------------|
| C | 0.0000000000 | 0.0000000000 | -0.6725882558 |
| C | 0.0000000000 | 0.0000000000 | 0.5381060408  |
| H | 0.0000000000 | 0.0000000000 | 1.6025417027  |

Rotational Constants (GHz): 43.9464233, 43.9464233

### Harmonic Vibrational Frequencies (cm<sup>-1</sup>):

$\sigma^+$ : 3445 2020

$\pi^+$ : 370

### 3 Pre-Reactive Complexes

#### 3.1 CN + H<sub>2</sub> → HCN + H

##### Level of Theory:

Reference: ROHF  
Geometry: CCSD(T)-F12a/aug-cc-pVTZ  
Frequencies: CCSD(T)-F12a/aug-cc-pVTZ  
Program: MOLPRO 2010.1

##### Wavefunction Diagnostics:

$T_1$ : 0.041  
 $D_1$ : 0.149

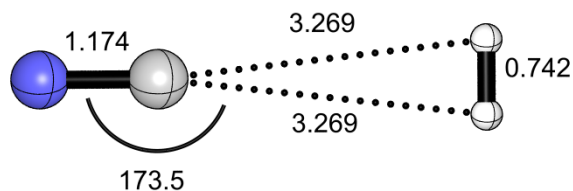

Figure S21: PRC (CN + H<sub>2</sub> → HCN + H)

##### Cartesian Coordinates (Å):

|   |              |               |               |
|---|--------------|---------------|---------------|
| C | 0.0000000000 | 0.0000000000  | -0.3529809957 |
| N | 0.0000000000 | 0.0000000000  | 0.8209492554  |
| H | 0.0000000000 | 0.3712222556  | -3.6009758503 |
| H | 0.0000000000 | -0.3712222556 | -3.6009758503 |

Rotational Constants (GHz): 13.5293712, 13.6307420, 1819.2169740

##### Harmonic Vibrational Frequencies (cm<sup>-1</sup>):

$a_1$ : 4392 2071 85 12i  
 $b_2$ : 160

##### Incremental Focal Point Analysis Table (kcal mol<sup>-1</sup>):

| Basis       | ROHF    | + $\delta$ MP2 | + $\delta$ CCSD | + $\delta$ (T) | + $\delta$ T | + $\delta$ (Q) | Net     |
|-------------|---------|----------------|-----------------|----------------|--------------|----------------|---------|
| aug-cc-pVDZ | -0.08   | -0.28          | +0.03           | -0.04          | -0.00        | -0.00          | [-0.37] |
| aug-cc-pVTZ | -0.05   | -0.27          | +0.04           | -0.03          | [-0.00]      | [-0.00]        | [-0.32] |
| aug-cc-pVQZ | -0.02   | -0.26          | +0.05           | -0.03          | [-0.00]      | [-0.00]        | [-0.27] |
| aug-cc-pV5Z | -0.01   | -0.25          | +0.04           | -0.03          | [-0.00]      | [-0.00]        | [-0.25] |
| CBS LIMIT   | [-0.01] | [-0.23]        | [+0.04]         | [-0.03]        | [-0.00]      | [-0.00]        | [-0.24] |

$$\begin{aligned}\Delta H_{0K} &= \Delta E_{\text{CCSD(T)}/\text{CBS}} + \delta_{\text{ZPVE}} + \delta_{\text{T(Q)}} + \delta_{\text{CORE}} + \delta_{\text{REL}} + \delta_{\text{DBOC}} \\ &= -0.23 + 0.34 - 0.01 + 0.00 - 0.07 + 0.19 = 0.22 \text{ kcal mol}^{-1}\end{aligned}$$



### 3.2 CN + H<sub>2</sub> → HNC + H

#### Level of Theory:

Reference: ROHF  
 Geometry: CCSD(T)-F12a/aug-cc-pVTZ  
 Frequencies: CCSD(T)-F12a/aug-cc-pVTZ  
 Program: MOLPRO 2010.1

#### Wavefunction Diagnostics:

$T_1$ : 0.041  
 $D_1$ : 0.149

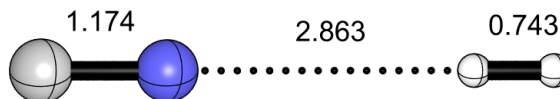

Figure S22: PRC (CN + H<sub>2</sub>)

#### Cartesian Coordinates (Å):

|   |              |              |               |
|---|--------------|--------------|---------------|
| N | 0.0000000000 | 0.0000000000 | -0.2702877289 |
| C | 0.0000000000 | 0.0000000000 | 0.9033919869  |
| H | 0.0000000000 | 0.0000000000 | -3.1332849597 |
| H | 0.0000000000 | 0.0000000000 | -3.8758644170 |

Rotational Constants (GHz): 14.0920604, 14.0920604

#### Harmonic Vibrational Frequencies (cm<sup>-1</sup>):

|              |      |      |     |
|--------------|------|------|-----|
| $\sigma^+$ : | 4391 | 2072 | 108 |
| $\pi$ :      |      | 181  | 22  |

#### Incremental Focal Point Analysis Table (kcal mol<sup>-1</sup>):

| Basis       | ROHF    | + $\delta$ MP2 | + $\delta$ CCSD | + $\delta$ (T) | + $\delta$ T | + $\delta$ (Q) | Net     |
|-------------|---------|----------------|-----------------|----------------|--------------|----------------|---------|
| aug-cc-pVDZ | -0.17   | -0.40          | +0.09           | -0.05          | -0.01        | -0.00          | [-0.55] |
| aug-cc-pVTZ | -0.15   | -0.40          | +0.09           | -0.05          | [-0.01]      | [-0.00]        | [-0.52] |
| aug-cc-pVQZ | -0.07   | -0.37          | +0.10           | -0.04          | [-0.01]      | [-0.00]        | [-0.40] |
| aug-cc-pV5Z | -0.06   | -0.34          | +0.10           | -0.04          | [-0.01]      | [-0.00]        | [-0.37] |
| CBS LIMIT   | [-0.06] | [-0.31]        | [+0.09]         | [-0.04]        | [-0.01]      | [-0.00]        | [-0.34] |

$$\Delta H_{0K} = \Delta E_{\text{CCSD(T)/CBS}} + \delta_{\text{ZPVE}} + \delta_{\text{T(Q)}} + \delta_{\text{CORE}} + \delta_{\text{REL}} + \delta_{\text{DBOC}}$$

$$= -0.32 + 0.66 - 0.02 + 0.00 + 0.00 + 0.02 = 0.34 \text{ kcal mol}^{-1}$$

## 4 Transition States

### 4.1 $\text{CN} + \text{H}_2 \rightarrow \text{HCN} + \text{H}$

#### Level of Theory:

Reference: ROHF  
Geometry: CCSD(T)-F12a/aug-cc-pVTZ  
Frequencies: CCSD(T)-F12a/aug-cc-pVTZ  
Program: MOLPRO 2010.1

#### Wavefunction Diagnostics:

$T_1$ : 0.028  
 $D_1$ : 0.097

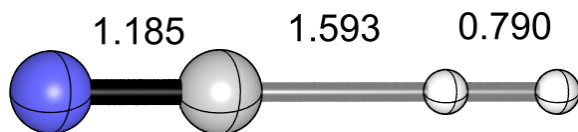

#### Cartesian Coordinates (Å):

|   |              |              |               |
|---|--------------|--------------|---------------|
| C | 0.0000000000 | 0.0000000000 | -0.4492016545 |
| N | 0.0000000000 | 0.0000000000 | 0.7358905242  |
| H | 0.0000000000 | 0.0000000000 | -2.0417298808 |
| H | 0.0000000000 | 0.0000000000 | -2.8316125133 |

Rotational Constants (GHz): 22.6706911, 22.6706911

#### Harmonic Vibrational Frequencies ( $\text{cm}^{-1}$ ):

|              |      |      |      |
|--------------|------|------|------|
| $\sigma^+$ : | 3088 | 2001 | 750i |
| $\pi$ :      | 431  | 132  |      |

#### Incremental Focal Point Analysis Table ( $\text{kcal mol}^{-1}$ ):

| Basis       | ROHF     | $+\delta\text{MP2}$ | $+\delta\text{CCSD}$ | $+\delta(\text{T})$ | $+\delta\text{T}$ | $+\delta(\text{Q})$ | Net     |
|-------------|----------|---------------------|----------------------|---------------------|-------------------|---------------------|---------|
| aug-cc-pVDZ | +12.50   | -11.14              | +2.87                | -0.77               | +0.21             | -0.13               | [+3.55] |
| aug-cc-pVTZ | +13.48   | -11.60              | +3.07                | -0.84               | [+0.21]           | [-0.13]             | [+4.20] |
| aug-cc-pVQZ | +13.71   | -11.67              | +3.11                | -0.85               | [+0.21]           | [-0.13]             | [+4.38] |
| aug-cc-pV5Z | +13.74   | -11.65              | +3.12                | -0.85               | [+0.21]           | [-0.13]             | [+4.44] |
| CBS LIMIT   | [+13.74] | [-11.62]            | [+3.12]              | [-0.85]             | [+0.21]           | [-0.13]             | [+4.48] |

$$\begin{aligned}\Delta H_{0\text{K}} &= \Delta E_{\text{CCSD(T)}/\text{CBS}} + \delta_{\text{ZPVE}} + \delta_{\text{T(Q)}} + \delta_{\text{CORE}} + \delta_{\text{REL}} + \delta_{\text{DBOC}} \\ &= 4.40 - 0.37 + 0.08 - 0.02 + 0.03 + 0.11 = 4.24 \text{ kcal mol}^{-1}\end{aligned}$$

## 4.2 CN + H<sub>2</sub> → HNC + H

### Level of Theory:

Reference: ROHF  
 Geometry: CCSD(T)-F12a/aug-cc-pVTZ  
 Frequencies: CCSD(T)-F12a/aug-cc-pVTZ  
 Program: MOLPRO 2010.1

### Wavefunction Diagnostics:

$T_1$ : 0.059

$D_1$ : 0.213

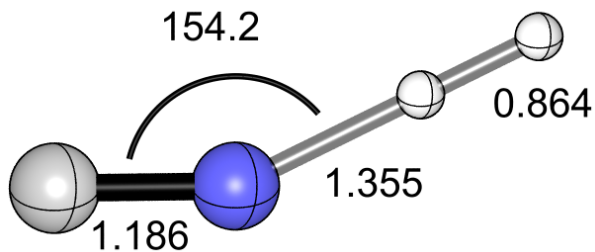

Figure S24: TS (CN + H<sub>2</sub> → HNC + H)

### Cartesian Coordinates (Å):

|   |               |              |               |
|---|---------------|--------------|---------------|
| N | 0.1272018683  | 0.0000000000 | -0.3755122798 |
| C | -0.0912393850 | 0.0000000000 | 0.7903786967  |
| H | -0.2272181635 | 0.0000000000 | -1.6832279975 |
| H | -0.4531816168 | 0.0000000000 | -2.5169730828 |

Rotational Constants (GHz): 26.9974073, 26.1783866, 862.9189757

### Harmonic Vibrational Frequencies (cm<sup>-1</sup>):

$a'$ : 2337i 2091 1845 779 103

$a''$ : 782

### Incremental Focal Point Analysis Table (kcal mol<sup>-1</sup>):

| Basis     | ROHF     | + $\delta$ MP2 | + $\delta$ CCSD | + $\delta$ (T) | + $\delta$ T | + $\delta$ (Q) | Net      |
|-----------|----------|----------------|-----------------|----------------|--------------|----------------|----------|
| cc-pVDZ   | +26.03   | -7.30          | -0.46           | -1.67          | +0.06        | -0.34          | [+16.32] |
| cc-pVTZ   | +26.92   | -7.80          | -0.05           | -1.72          | [+0.06]      | [-0.34]        | [+17.06] |
| cc-pVQZ   | +27.19   | -7.99          | +0.06           | -1.74          | [+0.06]      | [-0.34]        | [+17.23] |
| cc-pV5Z   | +27.23   | -7.97          | +0.10           | -1.74          | [+0.06]      | [-0.34]        | [+17.34] |
| CBS LIMIT | [+27.24] | [-7.95]        | [+0.14]         | [-1.74]        | [+0.06]      | [-0.34]        | [+17.41] |

$$\Delta H_{0K} = \Delta E_{\text{CCSD(T)/CBS}} + \delta_{\text{ZPVE}} + \delta_{\text{T(Q)}} + \delta_{\text{CORE}} + \delta_{\text{REL}} + \delta_{\text{DBOC}}$$

$$= 17.69 - 1.25 - 0.28 + 0.04 + 0.01 + 0.38 = 16.59 \text{ kcal mol}^{-1}$$

### 4.3 CN + CH<sub>4</sub> → HCN + CH<sub>3</sub>

#### Level of Theory:

Reference: ROHF  
 Geometry: CCSD(T)-F12a/aug-cc-pVTZ  
 Frequencies: CCSD(T)-F12a/aug-cc-pVTZ  
 Program: MOLPRO 2010.1

#### Wavefunction Diagnostics:

$T_1$ : 0.024  
 $D_1$ : 0.097

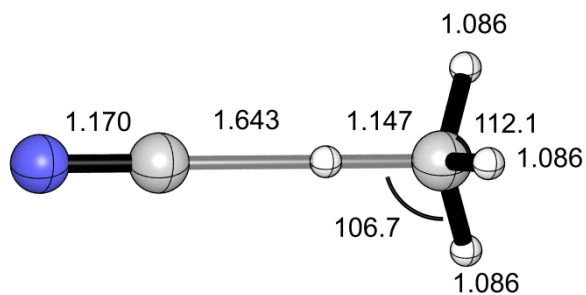

Figure S25: TS (CN + CH<sub>4</sub> → HCN + CH<sub>3</sub>)

#### Cartesian Coordinates (Å):

|   |               |               |               |
|---|---------------|---------------|---------------|
| C | -0.0000000000 | 0.0000000000  | 0.6694214628  |
| N | -0.0000000000 | 0.0000000000  | 1.8394835943  |
| H | 0.0000000000  | 0.0000000000  | -0.9735927729 |
| C | 0.0000000000  | 0.0000000000  | -2.1205017354 |
| H | 1.0407464759  | 0.0000000000  | -2.4323030494 |
| H | -0.5203732379 | -0.9013128870 | -2.4323030494 |
| H | -0.5203732379 | 0.9013128870  | -2.4323030494 |

Rotational Constants (GHz): 3.9710148, 3.9710148, 154.3019336

#### Harmonic Vibrational Frequencies (cm<sup>-1</sup>):

|         |      |      |      |      |      |      |      |         |     |    |
|---------|------|------|------|------|------|------|------|---------|-----|----|
| $a'$ :  | 3189 | 3068 | 2115 | 1852 | 1481 | 1274 | 1214 | 307.74i | 263 | 63 |
| $a''$ : |      |      |      |      |      | 3189 | 1481 | 1274    | 262 | 63 |

#### Incremental Focal Point Analysis Table (kcal mol<sup>-1</sup>):

| Basis       | ROHF     | + $\delta$ MP2 | + $\delta$ CCSD | + $\delta$ (T) | + $\delta$ T | + $\delta$ (Q) | Net     |
|-------------|----------|----------------|-----------------|----------------|--------------|----------------|---------|
| aug-cc-pVDZ | +9.57    | -9.57          | +2.92           | -0.89          | +0.28        | -0.10          | [+2.21] |
| aug-cc-pVTZ | +10.06   | -10.13         | +3.09           | -0.90          | [+0.28]      | [-0.10]        | [+2.29] |
| aug-cc-pVQZ | +10.24   | -10.17         | +3.12           | -0.91          | [+0.28]      | [-0.10]        | [+2.46] |
| aug-cc-pV5Z | +10.27   | -10.12         | +3.12           | -0.90          | [+0.28]      | [-0.10]        | [+2.54] |
| CBS LIMIT   | [+10.27] | [-10.06]       | [+3.11]         | [-0.89]        | [+0.28]      | [-0.10]        | [+2.60] |

$$\Delta H_{0K} = \Delta E_{\text{CCSD(T)/CBS}} + \delta_{\text{ZPVE}} + \delta_{\text{T(Q)}} + \delta_{\text{CORE}} + \delta_{\text{REL}} + \delta_{\text{DBOC}}$$

$$= 2.43 - 1.37 - 0.17 - 0.06 - 0.08 + 0.10 = 1.19 \text{ kcal mol}^{-1}$$

#### 4.4 CN + CH<sub>4</sub> → HNC + CH<sub>3</sub>

##### Level of Theory:

Reference: ROHF  
 Geometry: CCSD(T)-F12a/aug-cc-pVTZ  
 Frequencies: CCSD(T)-F12a/aug-cc-pVTZ  
 Program: MOLPRO 2010.1

##### Wavefunction Diagnostics:

$T_1$ : 0.045  
 $D_1$ : 0.203

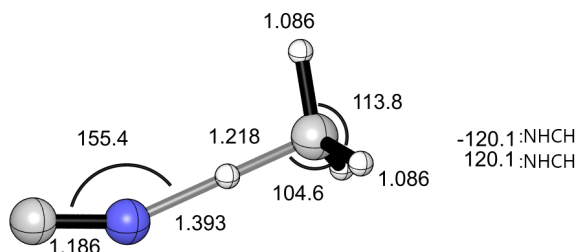

Figure S26: TS (CN+ CH<sub>4</sub> → HNC + CH<sub>3</sub>)

##### Cartesian Coordinates (Å):

|   |               |               |               |
|---|---------------|---------------|---------------|
| N | 0.0000000000  | -0.2099914824 | 0.6604948996  |
| C | 0.0000000000  | 0.1707590370  | 1.7838655116  |
| H | 0.0000000000  | -0.0668530267 | -0.7249558774 |
| C | 0.0000000000  | 0.0583250712  | -1.9365666359 |
| H | 0.0000000000  | 1.1302368195  | -2.1097668872 |
| H | 0.9094848134  | -0.4375600668 | -2.2620544093 |
| H | -0.9094848134 | -0.4375600668 | -2.2620544093 |

Rotational Constants (GHz): 4.7058258, 4.7509181, 116.0661990

##### Harmonic Vibrational Frequencies (cm<sup>-1</sup>):

|         |      |       |      |      |      |      |      |      |     |
|---------|------|-------|------|------|------|------|------|------|-----|
| $a'$ :  | 3066 | 2040i | 2015 | 1448 | 1261 | 610  | 379  | 63   | 31  |
| $a''$ : |      |       |      |      |      | 3205 | 1447 | 1196 | 376 |

##### Incremental Focal Point Analysis Table (kcal mol<sup>-1</sup>):

| Basis       | ROHF     | + $\delta$ MP2 | + $\delta$ CCSD | + $\delta$ (T) | + $\delta$ T | + $\delta$ (Q) | Net      |
|-------------|----------|----------------|-----------------|----------------|--------------|----------------|----------|
| aug-cc-pVDZ | +24.36   | -7.66          | +0.35           | -2.12          | +0.18        | -0.38          | [+14.73] |
| aug-cc-pVTZ | +24.85   | -8.14          | +0.72           | -2.08          | [+0.18]      | [-0.38]        | [+15.14] |
| aug-cc-pVQZ | +25.16   | -8.24          | +0.85           | -2.09          | [+0.18]      | [-0.38]        | [+15.48] |
| aug-cc-pV5Z | +25.20   | -8.14          | +0.88           | -2.08          | [+0.18]      | [-0.38]        | [+15.67] |
| CBS LIMIT   | [+25.21] | [-8.04]        | [+0.91]         | [-2.06]        | [+0.18]      | [-0.38]        | [+15.82] |

$$\Delta H_{0K} = \Delta E_{\text{CCSD(T)/CBS}} + \delta_{\text{ZPVE}} + \delta_{\text{T(Q)}} + \delta_{\text{CORE}} + \delta_{\text{REL}} + \delta_{\text{DBOC}}$$

$$= 16.02 - 3.26 - 0.20 + 0.13 + 0.04 + 0.06 = 12.79 \text{ kcal mol}^{-1}$$

## 4.5 CN + NH<sub>3</sub> → HCN + NH<sub>2</sub>

### Level of Theory:

Reference: ROHF  
 Geometry: CCSD(T)-F12a/aug-cc-pVTZ  
 Frequencies: CCSD(T)-F12a/aug-cc-pVTZ  
 Program: MOLPRO 2010.1

### Wavefunction Diagnostics:

$T_1$ : 0.045

$D_1$ : 0.205

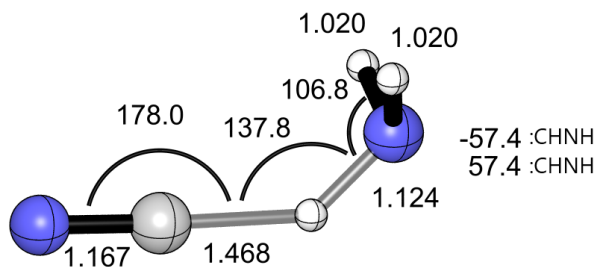

Figure S27: TS (CN + NH<sub>3</sub> → HCN + NH<sub>2</sub>)

### Cartesian Coordinates (Å):

|   |               |               |               |
|---|---------------|---------------|---------------|
| C | -0.1930371157 | 0.0000000000  | 0.5665903100  |
| N | 0.1240334970  | 0.0000000000  | 1.6899509343  |
| H | -0.5417518488 | 0.0000000000  | -0.8589157330 |
| N | -0.0055362110 | 0.0000000000  | -1.8470882501 |
| H | 0.5976874709  | -0.8219316534 | -1.8545773794 |
| H | 0.5976874709  | 0.8219316534  | -1.8545773794 |

Rotational Constants (GHz): 5.0194476, 5.0036654, 166.1713330

### Harmonic Vibrational Frequencies (cm<sup>-1</sup>):

$a'$ : 3451 2160 1824 1580 1067*i* 862 380 127  
 $a''$ : 3551 1453 562 152

### Incremental Focal Point Analysis Table (kcal mol<sup>-1</sup>):

| Basis       | ROHF    | + $\delta$ MP2 | + $\delta$ CCSD | + $\delta$ (T) | + $\delta$ T | + $\delta$ (Q) | Net     |
|-------------|---------|----------------|-----------------|----------------|--------------|----------------|---------|
| aug-cc-pVDZ | +5.39   | -2.41          | -2.08           | -1.65          | +0.28        | -0.27          | [-0.74] |
| aug-cc-pVTZ | +5.70   | -3.21          | -2.04           | -1.57          | [+0.28]      | [-0.27]        | [-1.13] |
| aug-cc-pVQZ | +5.97   | -3.35          | -1.98           | -1.59          | [+0.28]      | [-0.27]        | [-0.93] |
| aug-cc-pV5Z | +6.02   | -3.32          | -1.97           | -1.58          | [+0.28]      | [-0.27]        | [-0.84] |
| CBS LIMIT   | [+6.02] | [-3.29]        | [-1.96]         | [-1.57]        | [+0.28]      | [-0.27]        | [-0.79] |

$$\Delta H_{0K} = \Delta E_{\text{CCSD(T)/CBS}} + \delta_{\text{ZPVE}} + \delta_{\text{T(Q)}} + \delta_{\text{CORE}} + \delta_{\text{REL}} + \delta_{\text{DBOC}}$$

$$= -0.79 - 1.53 + 0.00 - 0.11 - 0.01 + 0.03 = -2.41 \text{ kcal mol}^{-1}$$



## 4.7 CN + H<sub>2</sub>O → HCN + OH

### Level of Theory:

Reference: ROHF  
 Geometry: CCSD(T)/aug-cc-pVTZ  
 Frequencies: CCSD(T)/aug-cc-pVTZ  
 Program: MOLPRO 2010.1

### Wavefunction Diagnostics:

$T_1$ : 0.107  
 $D_1$ : 0.503

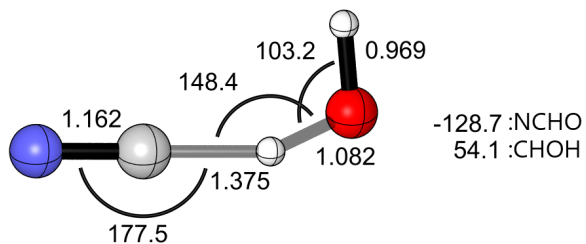

Figure S29: TS (CN + H<sub>2</sub>O → HCN + OH)

### Cartesian Coordinates (Å):

|   |               |               |               |
|---|---------------|---------------|---------------|
| C | 0.5792365172  | 0.1057568987  | 0.0528501648  |
| N | 1.7251151012  | -0.0677374396 | -0.0349319533 |
| H | -0.7706839662 | 0.3092592014  | 0.2160713101  |
| O | -1.7829938575 | 0.0190036440  | -0.0332787295 |
| H | -1.7981330206 | -0.9289223997 | 0.1681652006  |

Rotational Constants (GHz): 5.0247066, 4.9739375, 384.4788250

### Harmonic Vibrational Frequencies (cm<sup>-1</sup>):

$a'$ : 3767 2248 1563i 1514 1062 576 329 171 135

### Incremental Focal Point Analysis Table (kcal mol<sup>-1</sup>):

| Basis       | ROHF     | + $\delta$ MP2 | + $\delta$ CCSD | + $\delta$ (T) | + $\delta$ T | + $\delta$ (Q) | Net     |
|-------------|----------|----------------|-----------------|----------------|--------------|----------------|---------|
| aug-cc-pVDZ | +18.84   | +6.47          | -12.89          | -2.20          | +0.11        | -0.67          | [+9.66] |
| aug-cc-pVTZ | +18.47   | +5.98          | -12.81          | -2.25          | [+0.11]      | [-0.67]        | [+8.83] |
| aug-cc-pVQZ | +18.77   | +6.16          | -12.81          | -2.32          | [+0.11]      | [-0.67]        | [+9.25] |
| aug-cc-pV5Z | +18.81   | +6.35          | -12.85          | -2.32          | [+0.11]      | [-0.67]        | [+9.43] |
| CBS LIMIT   | [+18.81] | [+6.54]        | [-12.89]        | [-2.31]        | [+0.11]      | [-0.67]        | [+9.59] |

$$\Delta H_{0K} = \Delta E_{\text{CCSD(T)}/\text{CBS}} + \delta_{\text{ZPVE}} + \delta_{\text{T(Q)}} + \delta_{\text{CORE}} + \delta_{\text{REL}} + \delta_{\text{DBOC}}$$

$$= 10.14 - 2.42 - 0.55 - 0.13 - 0.05 + 0.16 = 7.15 \text{ kcal mol}^{-1}$$



## 4.8 CN + H<sub>2</sub>O → HNC + OH

### Level of Theory:

Reference: ROHF

Geometry: CCSD(T)-F12a/aug-cc-pVTZ

Frequencies: CCSD(T)-F12a/aug-cc-pVTZ

Program: MOLPRO 2010.1

### Wavefunction Diagnostics:

$T_1$ : 0.095

$D_1$ : 0.448

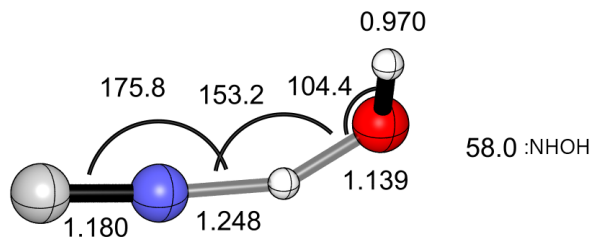

Figure S30: TS (CN + H<sub>2</sub>O → HNC + OH)

### Cartesian Coordinates (Å):

|   |               |               |               |
|---|---------------|---------------|---------------|
| N | 0.0765387670  | -0.1209349038 | 0.6115065409  |
| C | -0.0635843563 | 0.1036718763  | 1.7613306402  |
| H | 0.1722998898  | -0.2863148744 | -0.6220040517 |
| O | -0.0475444582 | -0.0105527527 | -1.7054502020 |
| H | 0.2764757917  | 0.8989840034  | -1.7931704866 |

Rotational Constants (GHz): 5.3821932, 5.4377410, 335.4231434

### Harmonic Vibrational Frequencies (cm<sup>-1</sup>):

$\alpha$ : 3863i 3751 2123 1386 945 646 397 142 106

### Incremental Focal Point Analysis Table (kcal mol<sup>-1</sup>):

| Basis       | ROHF     | + $\delta$ MP2 | + $\delta$ CCSD | + $\delta$ (T) | + $\delta$ T | + $\delta$ (Q) | Net      |
|-------------|----------|----------------|-----------------|----------------|--------------|----------------|----------|
| aug-cc-pVDZ | +42.69   | -14.59         | -2.26           | -4.66          | -0.24        | -1.45          | [+19.50] |
| aug-cc-pVTZ | +42.93   | -14.94         | -1.83           | -5.75          | [-0.24]      | [-1.45]        | [+18.73] |
| aug-cc-pVQZ | +43.33   | -14.85         | -1.46           | -5.92          | [-0.24]      | [-1.45]        | [+19.41] |
| aug-cc-pV5Z | +43.38   | -14.66         | -1.38           | -5.98          | [-0.24]      | [-1.45]        | [+19.68] |
| CBS LIMIT   | [+43.39] | [-14.46]       | [-1.30]         | [-6.04]        | [-0.24]      | [-1.45]        | [+19.90] |

$$\begin{aligned} \Delta H_{0K} &= \Delta E_{\text{CCSD(T)}/\text{CBS}} + \delta_{\text{ZPVE}} + \delta_{\text{T(Q)}} + \delta_{\text{CORE}} + \delta_{\text{REL}} + \delta_{\text{DBOC}} \\ &= 21.59 - 2.86 - 1.69 - 0.09 - 0.05 + 0.01 = 16.91 \text{ kcal mol}^{-1} \end{aligned}$$

## 4.9 CN + HF → HCN + F

### Level of Theory:

Reference: ROHF  
 Geometry: CCSD(T)-F12a/aug-cc-pVTZ  
 Frequencies: CCSD(T)-F12a/aug-cc-pVTZ  
 Program: MOLPRO 2010.1

### Wavefunction Diagnostics:

$T_1$ : 0.045  
 $D_1$ : 0.198

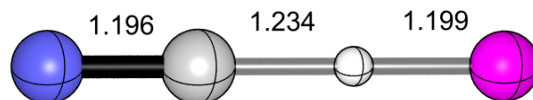

Figure S31: TS (CN + HF → HCN + F)

### Cartesian Coordinates (Å):

|   |              |              |               |
|---|--------------|--------------|---------------|
| C | 0.0000000000 | 0.0000000000 | 0.6675335023  |
| N | 0.0000000000 | 0.0000000000 | 1.8631375133  |
| H | 0.0000000000 | 0.0000000000 | -0.5665099344 |
| F | 0.0000000000 | 0.0000000000 | -1.7655770898 |

Rotational Constants (GHz): 4.4519066, 4.4519066

### Harmonic Vibrational Frequencies (cm<sup>-1</sup>):

|              |       |      |      |
|--------------|-------|------|------|
| $\sigma^+$ : | 7998i | 2106 | 1136 |
|              | 1101  | 566  | 164  |
|              |       |      | 49   |

### Incremental Focal Point Analysis Table (kcal mol<sup>-1</sup>):

| Basis       | ROHF     | + $\delta$ MP2 | + $\delta$ CCSD | + $\delta$ (T) | + $\delta$ T | + $\delta$ (Q) | Net      |
|-------------|----------|----------------|-----------------|----------------|--------------|----------------|----------|
| aug-cc-pVDZ | +26.56   | +5.48          | -8.66           | -2.09          | -0.10        | -0.54          | [+20.65] |
| aug-cc-pVTZ | +27.00   | +5.94          | -8.59           | -1.71          | [-0.10]      | [-0.54]        | [+22.00] |
| aug-cc-pVQZ | +27.42   | +6.66          | -8.54           | -1.69          | [-0.10]      | [-0.54]        | [+23.20] |
| aug-cc-pV5Z | +27.48   | +7.05          | -8.58           | -1.66          | [-0.10]      | [-0.54]        | [+23.64] |
| CBS LIMIT   | [+27.48] | [+7.46]        | [-8.62]         | [-1.64]        | [-0.10]      | [-0.54]        | [+24.03] |

$$\begin{aligned} \Delta H_{0K} &= \Delta E_{\text{CCSD(T)/CBS}} + \delta_{\text{ZPVE}} + \delta_{\text{T(Q)}} + \delta_{\text{CORE}} + \delta_{\text{REL}} + \delta_{\text{DBOC}} \\ &= 24.67 - 1.53 - 0.64 + 0.09 - 0.09 + 0.02 = 22.53 \text{ kcal mol}^{-1} \end{aligned}$$

## 4.10 CN + HF → HNC + F

### Level of Theory:

Reference: ROHF  
Geometry: CCSD(T)-F12a/aug-cc-pVTZ  
Frequencies: CCSD(T)-F12a/aug-cc-pVTZ  
Program: MOLPRO 2010.1

### Wavefunction Diagnostics:

$T_1$ : 0.044  
 $D_1$ : 0.203

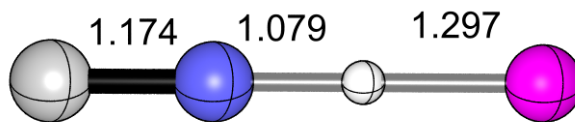

Figure S32: TS (CN + HF → HNC + F)

### Cartesian Coordinates (Å):

|   |              |              |               |
|---|--------------|--------------|---------------|
| N | 0.0000000000 | 0.0000000000 | 0.6978316756  |
| C | 0.0000000000 | 0.0000000000 | 1.8719375340  |
| H | 0.0000000000 | 0.0000000000 | -0.3807731160 |
| F | 0.0000000000 | 0.0000000000 | -1.6777391342 |

Rotational Constants (GHz): 4.9289799, 4.9289799

### Harmonic Vibrational Frequencies (cm<sup>-1</sup>):

$\sigma^+$ : 2706i 2084 626  
 $\pi$ : 366 197

### Incremental Focal Point Analysis Table (kcal mol<sup>-1</sup>):

| Basis       | ROHF     | + $\delta$ MP2 | + $\delta$ CCSD | + $\delta$ (T) | + $\delta$ T | + $\delta$ (Q) | Net      |
|-------------|----------|----------------|-----------------|----------------|--------------|----------------|----------|
| aug-cc-pVDZ | +59.29   | -39.89         | +16.09          | -4.05          | +0.40        | -1.35          | [+30.51] |
| aug-cc-pVTZ | +59.93   | -40.58         | +16.46          | -4.45          | [+0.40]      | [-1.35]        | [+30.41] |
| aug-cc-pVQZ | +60.45   | -40.49         | +16.81          | -4.65          | [+0.40]      | [-1.35]        | [+31.18] |
| aug-cc-pV5Z | +60.55   | -40.29         | +16.91          | -4.72          | [+0.40]      | [-1.35]        | [+31.51] |
| CBS LIMIT   | [+60.57] | [-40.08]       | [+17.02]        | [-4.78]        | [+0.40]      | [-1.35]        | [+31.78] |

$$\begin{aligned}\Delta H_{0K} &= \Delta E_{\text{CCSD(T)/CBS}} + \delta_{\text{ZPVE}} + \delta_{\text{T(Q)}} + \delta_{\text{CORE}} + \delta_{\text{REL}} + \delta_{\text{DBOC}} \\ &= 32.72 - 3.40 - 0.94 - 0.03 - 0.08 - 0.01 = 28.25 \text{ kcal mol}^{-1}\end{aligned}$$

## 4.11 CN + HCl → HCN + Cl

### Level of Theory:

Reference: ROHF  
Geometry: CCSD(T)-F12a/aug-cc-pVTZ  
Frequencies: CCSD(T)-F12a/aug-cc-pVTZ  
Program: MOLPRO 2010.1

### Wavefunction Diagnostics:

$T_1$ : 0.027  
 $D_1$ : 0.137

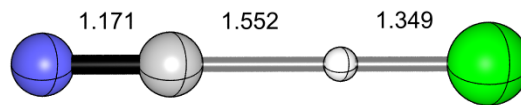

Figure S33: TS (CN + HCl → HCN + Cl)

### Cartesian Coordinates (Å):

|    |              |              |               |
|----|--------------|--------------|---------------|
| C  | 0.0000000000 | 0.0000000000 | 1.4085685018  |
| N  | 0.0000000000 | 0.0000000000 | 2.5793511730  |
| H  | 0.0000000000 | 0.0000000000 | -0.1429663500 |
| Cl | 0.0000000000 | 0.0000000000 | -1.4921843807 |

Rotational Constants (GHz): 2.5787448, 2.5787448

### Harmonic Vibrational Frequencies (cm<sup>-1</sup>):

$\sigma^+$ : 2114 1148 518i  
 $\pi$ : 235 93

### Incremental Focal Point Analysis Table (kcal mol<sup>-1</sup>):

| Basis           | ROHF     | + $\delta$ MP2 | + $\delta$ CCSD | + $\delta$ (T) | + $\delta$ T | + $\delta$ (Q) | Net     |
|-----------------|----------|----------------|-----------------|----------------|--------------|----------------|---------|
| aug-cc-pV(D+d)Z | +16.77   | -13.47         | +2.92           | -1.59          | +0.20        | -0.21          | [+4.62] |
| aug-cc-pV(T+d)Z | +16.96   | -14.03         | +3.30           | -1.75          | [+0.20]      | [-0.21]        | [+4.46] |
| aug-cc-pV(Q+d)Z | +17.15   | -13.95         | +3.46           | -1.80          | [+0.20]      | [-0.21]        | [+4.86] |
| aug-cc-pV(5+d)Z | +17.18   | -13.89         | +3.50           | -1.80          | [+0.20]      | [-0.21]        | [+4.98] |
| CBS LIMIT       | [+17.18] | [-13.83]       | [+3.55]         | [-1.81]        | [+0.20]      | [-0.21]        | [+5.08] |

$$\begin{aligned}\Delta H_{0K} &= \Delta E_{\text{CCSD(T)/CBS}} + \delta_{\text{ZPVE}} + \delta_{\text{T(Q)}} + \delta_{\text{CORE}} + \delta_{\text{REL}} + \delta_{\text{DBOC}} \\ &= 5.09 - 1.64 - 0.01 - 0.09 + 0.06 + 0.06 = 3.47 \text{ kcal mol}^{-1}\end{aligned}$$

## 4.12 CN + HCl → HNC + Cl

### Level of Theory:

Reference: ROHF  
Geometry: CCSD(T)-F12a/aug-cc-pVTZ  
Frequencies: CCSD(T)-F12a/aug-cc-pVTZ  
Program: MOLPRO 2010.1

### Wavefunction Diagnostics:

$T_1$ : 0.014  
 $D_1$ : 0.044

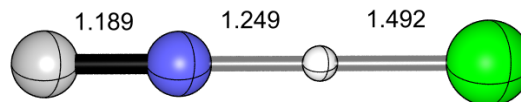

Figure S34: TS (CN + HCl → HNC + Cl)

### Cartesian Coordinates (Å):

|    |              |              |               |
|----|--------------|--------------|---------------|
| N  | 0.0000000000 | 0.0000000000 | 1.3470922075  |
| C  | 0.0000000000 | 0.0000000000 | 2.5365431003  |
| H  | 0.0000000000 | 0.0000000000 | 0.0980425130  |
| Cl | 0.0000000000 | 0.0000000000 | -1.3943405797 |

Rotational Constants (GHz): 2.9445216, 2.9445216

### Harmonic Vibrational Frequencies (cm<sup>-1</sup>):

$\sigma^+$ : 2285i 1962 408  
 $\pi$ : 537 207

### Incremental Focal Point Analysis Table (kcal mol<sup>-1</sup>):

| Basis           | ROHF     | + $\delta$ MP2 | + $\delta$ CCSD | + $\delta$ (T) | + $\delta$ T | + $\delta$ (Q) | Net      |
|-----------------|----------|----------------|-----------------|----------------|--------------|----------------|----------|
| aug-cc-pV(D+d)Z | +34.69   | -34.80         | +14.94          | -4.10          | +0.87        | -1.28          | [+10.32] |
| aug-cc-pV(T+d)Z | +35.27   | -35.85         | +15.89          | -4.49          | [+0.87]      | [-1.28]        | [+10.41] |
| aug-cc-pV(Q+d)Z | +35.66   | -36.00         | +16.18          | -4.61          | [+0.87]      | [-1.28]        | [+10.82] |
| aug-cc-pV(5+d)Z | +35.74   | -35.92         | +16.27          | -4.64          | [+0.87]      | [-1.28]        | [+11.03] |
| CBS LIMIT       | [+35.76] | [-35.84]       | [+16.35]        | [-4.67]        | [+0.87]      | [-1.28]        | [+11.19] |

$$\begin{aligned}\Delta H_{0K} &= \Delta E_{\text{CCSD(T)/CBS}} + \delta_{\text{ZPVE}} + \delta_{\text{T(Q)}} + \delta_{\text{CORE}} + \delta_{\text{REL}} + \delta_{\text{DBOC}} \\ &= 11.60 - 1.73 - 0.41 + 0.07 - 0.15 + 0.09 = 9.47 \text{ kcal mol}^{-1}\end{aligned}$$

### 4.13 CN + C<sub>2</sub>H<sub>2</sub> → HCN + C<sub>2</sub>H

#### Level of Theory:

Reference: ROHF  
 Geometry: CCSD(T)-F12a/aug-cc-pVTZ  
 Frequencies: CCSD(T)-F12a/aug-cc-pVTZ  
 Program: MOLPRO 2010.1

#### Wavefunction Diagnostics:

$T_1$ : 0.024  
 $D_1$ : 0.083

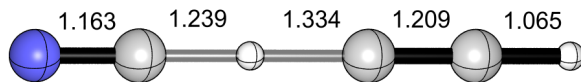

Figure S35: TS (CN + C<sub>2</sub>H<sub>2</sub> → HCN + C<sub>2</sub>H)

#### Cartesian Coordinates (Å):

|   |              |              |               |
|---|--------------|--------------|---------------|
| C | 0.0000000000 | 0.0000000000 | 1.3015250371  |
| C | 0.0000000000 | 0.0000000000 | 2.5107935879  |
| H | 0.0000000000 | 0.0000000000 | 3.5761496032  |
| H | 0.0000000000 | 0.0000000000 | -0.0321240518 |
| C | 0.0000000000 | 0.0000000000 | -1.2710182629 |
| N | 0.0000000000 | 0.0000000000 | -2.4342438807 |

Rotational Constants (GHz): 2.3911160, 2.3911160

#### Harmonic Vibrational Frequencies (cm<sup>-1</sup>):

|              |      |      |      |               |     |
|--------------|------|------|------|---------------|-----|
| $\sigma^+$ : | 3439 | 2210 | 2049 | 1669 <i>i</i> | 450 |
| $\pi$ :      |      | 705  | 594  | 184           | 66  |

#### Incremental Focal Point Analysis Table (kcal mol<sup>-1</sup>):

| Basis       | ROHF     | + $\delta$ MP2 | + $\delta$ CCSD | + $\delta$ (T) | + $\delta$ T | + $\delta$ (Q) | Net      |
|-------------|----------|----------------|-----------------|----------------|--------------|----------------|----------|
| aug-cc-pVDZ | +29.45   | -14.75         | +3.34           | -1.33          | +0.39        | -0.19          | [+16.91] |
| aug-cc-pVTZ | +30.19   | -14.90         | +3.78           | -1.34          | [+0.39]      | [-0.19]        | [+17.94] |
| aug-cc-pVQZ | +30.48   | -14.78         | +3.90           | -1.33          | [+0.39]      | [-0.19]        | [+18.47] |
| aug-cc-pV5Z | +30.51   | -14.62         | +3.89           | -1.32          | [+0.39]      | [-0.19]        | [+18.67] |
| CBS LIMIT   | [+30.51] | [-14.46]       | [+3.89]         | [-1.30]        | [+0.39]      | [-0.19]        | [+18.84] |

$$\Delta H_{0K} = \Delta E_{\text{CCSD(T)}/\text{CBS}} + \delta_{\text{ZPVE}} + \delta_{\text{T(Q)}} + \delta_{\text{CORE}} + \delta_{\text{REL}} + \delta_{\text{DBOC}}$$

$$= 18.64 - 3.55 + 0.20 - 0.11 + 0.05 + 0.02 = 15.25 \text{ kcal mol}^{-1}$$

#### 4.14 CN + C<sub>2</sub>H<sub>2</sub> → HNC + C<sub>2</sub>H

##### Level of Theory:

Reference: ROHF  
 Geometry: CCSD(T)-F12a/aug-cc-pVTZ  
 Frequencies: CCSD(T)-F12a/aug-cc-pVTZ  
 Program: MOLPRO 2010.1

##### Wavefunction Diagnostics:

$T_1$ : 0.059  
 $D_1$ : 0.291

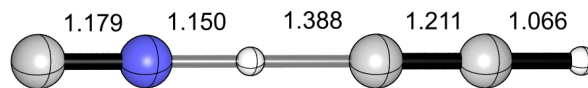

Figure S36: TS (CN + C<sub>2</sub>H<sub>2</sub> → HNC + C<sub>2</sub>H)

##### Cartesian Coordinates (Å):

|   |              |              |               |
|---|--------------|--------------|---------------|
| C | 0.0000000000 | 0.0000000000 | 1.2436611786  |
| C | 0.0000000000 | 0.0000000000 | 2.4545628572  |
| H | 0.0000000000 | 0.0000000000 | 3.5201551011  |
| H | 0.0000000000 | 0.0000000000 | -0.1443349062 |
| N | 0.0000000000 | 0.0000000000 | -1.2939076582 |
| C | 0.0000000000 | 0.0000000000 | -2.4726181587 |

Rotational Constants (GHz): 2.5226526, 2.5226526

##### Harmonic Vibrational Frequencies (cm<sup>-1</sup>):

$\sigma^+$ : 3434 2519*i* 2106 2028 441  
 $\pi$ : 712 359 140 38*i*

##### Incremental Focal Point Analysis Table (kcal mol<sup>-1</sup>):

| Basis       | ROHF     | + $\delta$ MP2 | + $\delta$ CCSD | + $\delta$ (T) | + $\delta$ T | + $\delta$ (Q) | Net      |
|-------------|----------|----------------|-----------------|----------------|--------------|----------------|----------|
| aug-cc-pVDZ | +62.51   | -37.68         | +10.38          | -4.71          | +0.10        | -0.27          | [+30.33] |
| aug-cc-pVTZ | +63.64   | -38.01         | +11.17          | -5.06          | [+0.10]      | [-0.27]        | [+31.57] |
| aug-cc-pVQZ | +64.02   | -37.97         | +11.45          | -5.15          | [+0.10]      | [-0.27]        | [+32.17] |
| aug-cc-pV5Z | +64.19   | -37.75         | +11.33          | -5.17          | [+0.10]      | [-0.27]        | [+32.43] |
| CBS LIMIT   | [+64.26] | [-37.51]       | [+11.20]        | [-5.19]        | [+0.10]      | [-0.27]        | [+32.59] |

$$\Delta H_{0K} = \Delta E_{\text{CCSD(T)}/\text{CBS}} + \delta_{\text{ZPVE}} + \delta_{\text{T(Q)}} + \delta_{\text{CORE}} + \delta_{\text{REL}} + \delta_{\text{DBOC}}$$

$$= 32.76 - 4.71 - 0.17 + 0.07 - 0.04 - 0.01 = 27.91 \text{ kcal mol}^{-1}$$

#### 4.15 CN + SiH<sub>4</sub> → HCN + SiH<sub>3</sub>

##### Level of Theory:

Reference: ROHF  
 Geometry: CCSD(T)-F12a/aug-cc-pVTZ  
 Frequencies: CCSD(T)-F12a/aug-cc-pVTZ  
 Program: MOLPRO 2010.1

##### Wavefunction Diagnostics:

$T_1$ : 0.027  
 $D_1$ : 0.135

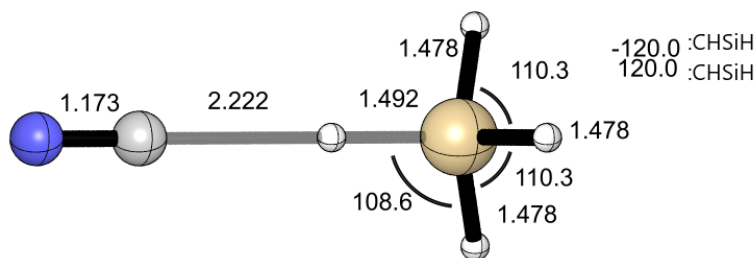

Figure S37: TS (CN + SiH<sub>4</sub> → HCN + SiH<sub>3</sub>)

##### Cartesian Coordinates (Å):

|    |               |               |               |
|----|---------------|---------------|---------------|
| C  | -0.0000002528 | 0.0000000000  | 1.7678150806  |
| N  | 0.0000010680  | 0.0000000000  | 2.9411044838  |
| H  | -0.0000027540 | 0.0000000000  | -0.4539749625 |
| Si | -0.0000044339 | 0.0000000000  | -1.9462478910 |
| H  | 1.4007158027  | 0.0000000000  | -2.4172983873 |
| H  | -0.7003006651 | -1.2130971099 | -2.4172960221 |
| H  | -0.7003006651 | 1.2130971099  | -2.4172960221 |

Rotational Constants (GHz): 1.7675309, 1.7675332, 85.1840170

##### Harmonic Vibrational Frequencies (cm<sup>-1</sup>):

$a'$ : 2274 2264 2113 2088 968 919 913 844i 750 66 19  
 $a''$ : 2274 969 919 70

##### Incremental Focal Point Analysis Table (kcal mol<sup>-1</sup>):

| Basis           | ROHF    | + $\delta$ MP2 | + $\delta$ CCSD | + $\delta$ (T) | + $\delta$ T | + $\delta$ (Q) | Net     |
|-----------------|---------|----------------|-----------------|----------------|--------------|----------------|---------|
| aug-cc-pV(D+d)Z | +1.46   | -2.74          | +0.62           | -0.35          | +0.06        | -0.03          | [-0.97] |
| aug-cc-pV(T+d)Z | +1.60   | -2.96          | +0.70           | -0.36          | [+0.06]      | [-0.03]        | [-0.98] |
| aug-cc-pV(Q+d)Z | +1.77   | -2.97          | +0.74           | -0.36          | [+0.06]      | [-0.03]        | [-0.78] |
| aug-cc-pV(5+d)Z | +1.78   | -2.90          | +0.73           | -0.35          | [+0.06]      | [-0.03]        | [-0.71] |
| CBS LIMIT       | [+1.78] | [-2.84]        | [+0.71]         | [-0.35]        | [+0.06]      | [-0.03]        | [-0.66] |

$$\Delta H_{0K} = \Delta E_{\text{CCSD(T)/CBS}} + \delta_{\text{ZPVE}} + \delta_{\text{T(Q)}} + \delta_{\text{CORE}} + \delta_{\text{REL}} + \delta_{\text{DBOC}}$$

$$= -0.69 + 1.02 + 0.03 - 0.04 + 0.02 + 0.01 = 0.35 \text{ kcal mol}^{-1}$$



## 4.16 CN + SiH<sub>4</sub> → HNC + SiH<sub>3</sub>

### Level of Theory:

Reference: ROHF  
 Geometry: CCSD(T)-F12a/aug-cc-pVTZ  
 Frequencies: CCSD(T)-F12a/aug-cc-pVTZ  
 Program: MOLPRO 2010.1

### Wavefunction Diagnostics:

$T_1$ : 0.062

$D_1$ : 0.333

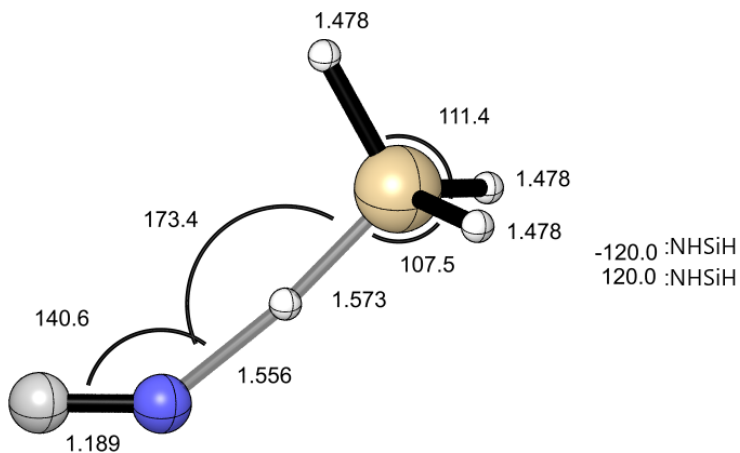

Figure S38: TS (CN + SiH<sub>4</sub> → HNC + SiH<sub>3</sub>)

### Cartesian Coordinates (Å):

|    |               |               |               |
|----|---------------|---------------|---------------|
| N  | -0.0000000002 | -0.3642314968 | 1.5069492427  |
| C  | 0.0000000001  | 0.3236017559  | 2.4763922149  |
| H  | -0.0000000001 | -0.2532467191 | -0.0451714263 |
| Si | 0.0000000000  | 0.0391624289  | -1.5907206166 |
| H  | 0.0000000006  | 1.5067088210  | -1.7636266496 |
| H  | 1.2208278307  | -0.5696819122 | -2.1588532246 |
| H  | -1.2208278306 | -0.5696819105 | -2.1588532275 |

Rotational Constants (GHz): 2.5886166, 2.6312269, 55.1085223

### Harmonic Vibrational Frequencies (cm<sup>-1</sup>):

$a$ : 2276 2254 1985 1455*i* 949 912 886 879 529 229 187 82 14

### Incremental Focal Point Analysis Table (kcal mol<sup>-1</sup>):

| Basis           | ROHF     | + $\delta$ MP2 | + $\delta$ CCSD | + $\delta$ (T) | + $\delta$ T | + $\delta$ (Q) | Net     |
|-----------------|----------|----------------|-----------------|----------------|--------------|----------------|---------|
| aug-cc-pV(D+d)Z | +17.25   | -1.83          | -5.25           | -1.70          | +0.21        | -0.44          | [+8.23] |
| aug-cc-pV(T+d)Z | +17.34   | -2.46          | -4.91           | -1.82          | [+0.21]      | [-0.44]        | [+7.92] |
| aug-cc-pV(Q+d)Z | +17.61   | -2.53          | -4.84           | -1.88          | [+0.21]      | [-0.44]        | [+8.14] |
| aug-cc-pV(5+d)Z | +17.65   | -2.44          | -4.84           | -1.88          | [+0.21]      | [-0.44]        | [+8.26] |
| CBS LIMIT       | [+17.65] | [-2.35]        | [-4.85]         | [-1.88]        | [+0.21]      | [-0.44]        | [+8.35] |

$$\Delta H_{0K} = \Delta E_{\text{CCSD(T)/CBS}} + \delta_{\text{ZPVE}} + \delta_{\text{T(Q)}} + \delta_{\text{CORE}} + \delta_{\text{REL}} + \delta_{\text{DBOC}}$$

$$= 8.57 - 2.09 - 0.22 - 0.01 - 0.04 + 0.15 = 6.36 \text{ kcal mol}^{-1}$$

## 4.17 CN + PH<sub>3</sub> → HCN + PH<sub>2</sub>

### Level of Theory:

Reference: ROHF

Geometry: CCSD(T)-F12a/aug-cc-pVTZ

Frequencies: CCSD(T)-F12a/aug-cc-pVTZ

Program: MOLPRO 2010.1

### Wavefunction Diagnostics:

$T_1$ : 0.026

$D_1$ : 0.121

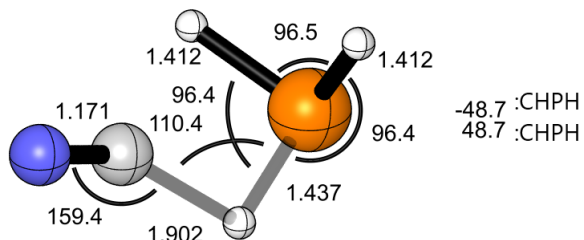

Figure S39: TS (CN + PH<sub>3</sub> → HCN + PH<sub>2</sub>)

### Cartesian Coordinates (Å):

|   |               |               |               |
|---|---------------|---------------|---------------|
| C | -0.0000000075 | -0.0873996942 | 1.2534072381  |
| N | 0.0000000047  | 0.0573260226  | 2.4149894681  |
| H | -0.0000000827 | -0.9717416765 | -0.4304532155 |
| P | -0.0000000009 | -0.0113581518 | -1.4992755206 |
| H | 1.0532921202  | 0.7828199651  | -0.9964066048 |
| H | -1.0532919865 | 0.7828201520  | -0.9964066140 |

Rotational Constants (GHz): 2.8928410, 2.8943724, 110.6984739

### Harmonic Vibrational Frequencies (cm<sup>-1</sup>):

$a$ : 2458 2444 2234 2112 1113 1095 822 423i 307 187 67 55

### Incremental Focal Point Analysis Table (kcal mol<sup>-1</sup>):

| Basis           | ROHF    | + $\delta$ MP2 | + $\delta$ CCSD | + $\delta$ (T) | + $\delta$ T | + $\delta$ (Q) | Net     |
|-----------------|---------|----------------|-----------------|----------------|--------------|----------------|---------|
| aug-cc-pV(D+d)Z | +6.38   | -12.04         | +3.69           | -1.44          | +0.28        | -0.21          | [-3.34] |
| aug-cc-pV(T+d)Z | +6.55   | -13.07         | +3.94           | -1.53          | [+0.28]      | [-0.21]        | [-4.03] |
| aug-cc-pV(Q+d)Z | +6.69   | -13.25         | +3.94           | -1.56          | [+0.28]      | [-0.21]        | [-4.11] |
| aug-cc-pV(5+d)Z | +6.71   | -13.26         | +3.92           | -1.57          | [+0.28]      | [-0.21]        | [-4.13] |
| CBS LIMIT       | [+6.71] | [-13.28]       | [+3.90]         | [-1.57]        | [+0.28]      | [-0.21]        | [-4.16] |

$$\Delta H_{0K} = \Delta E_{\text{CCSD(T)}/\text{CBS}} + \delta_{\text{ZPVE}} + \delta_{\text{T(Q)}} + \delta_{\text{CORE}} + \delta_{\text{REL}} + \delta_{\text{DBOC}}$$

$$= -4.24 + 0.35 + 0.08 - 0.15 + 0.36 + 0.01 = -3.59 \text{ kcal mol}^{-1}$$

## 4.18 CN + PH<sub>3</sub> → HNC + PH<sub>2</sub>

### Level of Theory:

Reference: ROHF  
 Geometry: CCSD(T)-F12a/aug-cc-pVTZ  
 Frequencies: CCSD(T)-F12a/aug-cc-pVTZ  
 Program: MOLPRO 2010.1

### Wavefunction Diagnostics:

$T_1$ : 0.076  
 $D_1$ : 0.413

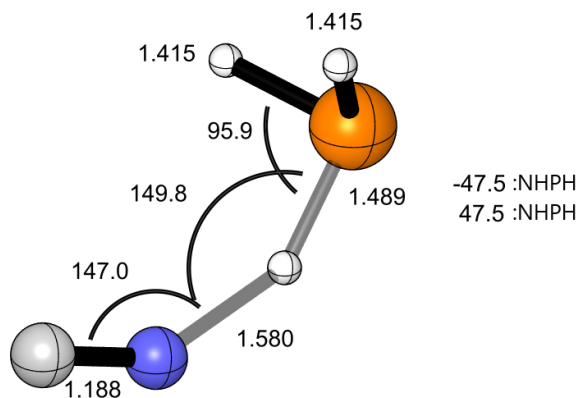

Figure S40: TS (CN + PH<sub>3</sub> → HNC + PH<sub>2</sub>)

### Cartesian Coordinates (Å):

|   |               |               |               |
|---|---------------|---------------|---------------|
| N | 0.0000000001  | -0.3995602301 | 1.4499044769  |
| C | -0.0000000001 | 0.3634013428  | 2.3605469525  |
| H | 0.0000000001  | -0.5894027024 | -0.1187295886 |
| P | -0.0000000000 | -0.0014967831 | -1.4862294390 |
| H | 1.0385583404  | 0.9287012664  | -1.2436852534 |
| H | -1.0385583397 | 0.9287012661  | -1.2436852567 |

Rotational Constants (GHz): 2.9072600, 2.9711302, 62.5039513

### Harmonic Vibrational Frequencies (cm<sup>-1</sup>):

$a$ : 2434 2424 2024 1240 1195*i* 1094 1048 774 295 246 81 51

### Incremental Focal Point Analysis Table (kcal mol<sup>-1</sup>):

| Basis           | ROHF     | + $\delta$ MP2 | + $\delta$ CCSD | + $\delta$ (T) | + $\delta$ T | + $\delta$ (Q) | Net     |
|-----------------|----------|----------------|-----------------|----------------|--------------|----------------|---------|
| aug-cc-pV(D+d)Z | +16.93   | -1.71          | -8.05           | -2.52          | +0.79        | -0.75          | [+4.70] |
| aug-cc-pV(T+d)Z | +17.12   | -1.47          | -8.30           | -2.75          | [+0.79]      | [-0.75]        | [+4.65] |
| aug-cc-pV(Q+d)Z | +17.35   | -1.44          | -8.34           | -2.84          | [+0.79]      | [-0.75]        | [+4.77] |
| aug-cc-pV(5+d)Z | +17.39   | -1.33          | -8.38           | -2.86          | [+0.79]      | [-0.75]        | [+4.87] |
| CBS LIMIT       | [+17.40] | [-1.20]        | [-8.42]         | [-2.87]        | [+0.79]      | [-0.75]        | [+4.94] |

$$\Delta H_{0K} = \Delta E_{\text{CCSD(T)/CBS}} + \delta_{\text{ZPVE}} + \delta_{\text{T(Q)}} + \delta_{\text{CORE}} + \delta_{\text{REL}} + \delta_{\text{DBOC}}$$

$$= 4.90 - 1.33 + 0.04 + 0.06 + 0.33 + 0.25 = 4.25 \text{ kcal mol}^{-1}$$

## 4.19 CN + H<sub>2</sub>S → HCN + SH

### Level of Theory:

Reference: ROHF

Geometry: CCSD(T)-F12a/aug-cc-pVTZ

Frequencies: CCSD(T)-F12a/aug-cc-pVTZ

Program: MOLPRO 2010.1

### Wavefunction Diagnostics:

$T_1$ : 0.025

$D_1$ : 0.119

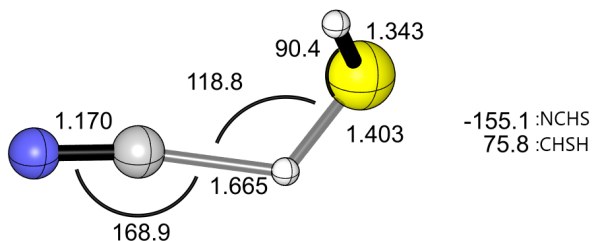

Figure S41: TS (CN + H<sub>2</sub>S → HCN + SH)

### Cartesian Coordinates (Å):

|   |               |               |               |
|---|---------------|---------------|---------------|
| C | -0.1359836200 | -0.1005558394 | 1.2089899538  |
| N | 0.0873703345  | 0.0761492502  | 2.3434820405  |
| H | -0.5004497750 | -0.6596782401 | -0.3163543654 |
| S | -0.0096611295 | 0.0399881260  | -1.4284198163 |
| H | 1.2140488054  | -0.4721776587 | -1.2219206511 |

Rotational Constants (GHz): 3.1116089, 3.0896794, 169.1724787

### Harmonic Vibrational Frequencies (cm<sup>-1</sup>):

$\alpha$ : 2705 2130 2005 1129 987i 428 226 100 85

### Incremental Focal Point Analysis Table (kcal mol<sup>-1</sup>):

| Basis           | ROHF     | + $\delta$ MP2 | + $\delta$ CCSD | + $\delta$ (T) | + $\delta$ T | + $\delta$ (Q) | Net     |
|-----------------|----------|----------------|-----------------|----------------|--------------|----------------|---------|
| aug-cc-pV(D+d)Z | +12.67   | -16.58         | +5.05           | -1.93          | +0.34        | -0.29          | [-0.73] |
| aug-cc-pV(T+d)Z | +12.84   | -17.69         | +5.59           | -2.05          | [+0.34]      | [-0.29]        | [-1.26] |
| aug-cc-pV(Q+d)Z | +13.02   | -17.88         | +5.74           | -2.09          | [+0.34]      | [-0.29]        | [-1.15] |
| aug-cc-pV(5+d)Z | +13.05   | -17.88         | +5.75           | -2.09          | [+0.34]      | [-0.29]        | [-1.11] |
| CBS LIMIT       | [+13.06] | [-17.88]       | [+5.77]         | [-2.10]        | [+0.34]      | [-0.29]        | [-1.10] |

$$\Delta H_{0K} = \Delta E_{\text{CCSD(T)}/\text{CBS}} + \delta_{\text{ZPVE}} + \delta_{\text{T(Q)}} + \delta_{\text{CORE}} + \delta_{\text{REL}} + \delta_{\text{DBOC}}$$

$$= -1.15 + 0.09 + 0.05 - 0.17 + 0.33 + 0.10 = -0.75 \text{ kcal mol}^{-1}$$

## 4.20 CN + H<sub>2</sub>S → HNC + SH

### Level of Theory:

Reference: ROHF  
 Geometry: CCSD(T)-F12a/aug-cc-pVTZ  
 Frequencies: CCSD(T)-F12a/aug-cc-pVTZ  
 Program: MOLPRO 2010.1

### Wavefunction Diagnostics:

$T_1$ : 0.050  
 $D_1$ : 0.268

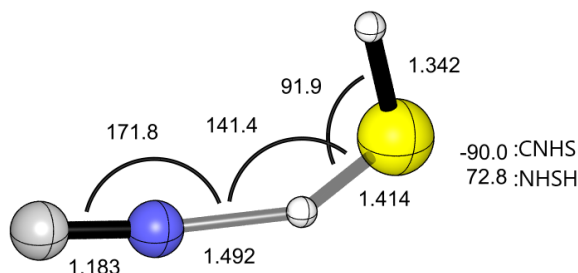

Figure S42: TS (CN + H<sub>2</sub>S → HNC + SH)

### Cartesian Coordinates (Å):

|   |               |               |               |
|---|---------------|---------------|---------------|
| N | -0.0866746370 | 0.1559174450  | 1.3010528157  |
| C | 0.0845121161  | -0.1344158069 | 2.4350777736  |
| H | -0.4243077877 | 0.3475393272  | -0.1394762715 |
| S | 0.0309875258  | 0.0110286547  | -1.4356594988 |
| H | -0.3639429663 | -1.2632677345 | -1.2930813036 |

Rotational Constants (GHz): 3.0627876, 3.0957117, 178.6773960

### Harmonic Vibrational Frequencies (cm<sup>-1</sup>):

$a$ : 2711 2481*i* 2035 1248 982 406 280 62 23

### Incremental Focal Point Analysis Table (kcal mol<sup>-1</sup>):

| Basis           | ROHF     | + $\delta$ MP2 | + $\delta$ CCSD | + $\delta$ (T) | + $\delta$ T | + $\delta$ (Q) | Net     |
|-----------------|----------|----------------|-----------------|----------------|--------------|----------------|---------|
| aug-cc-pV(D+d)Z | +30.25   | -23.28         | +5.47           | -3.90          | +0.47        | -1.22          | [+7.79] |
| aug-cc-pV(T+d)Z | +30.61   | -24.21         | +6.37           | -4.22          | [+0.47]      | [-1.22]        | [+7.80] |
| aug-cc-pV(Q+d)Z | +30.88   | -24.37         | +6.59           | -4.33          | [+0.47]      | [-1.22]        | [+8.02] |
| aug-cc-pV(5+d)Z | +30.93   | -24.29         | +6.63           | -4.35          | [+0.47]      | [-1.22]        | [+8.16] |
| CBS LIMIT       | [+30.94] | [-24.21]       | [+6.67]         | [-4.38]        | [+0.47]      | [-1.22]        | [+8.27] |

$$\Delta H_{0K} = \Delta E_{\text{CCSD(T)/CBS}} + \delta_{\text{ZPVE}} + \delta_{\text{T(Q)}} + \delta_{\text{CORE}} + \delta_{\text{REL}} + \delta_{\text{DBOC}}$$

$$= 9.03 - 1.45 - 0.76 - 0.04 + 0.67 + 0.03 = 7.47 \text{ kcal mol}^{-1}$$

## 4.21 CN + HCN → HCN + CN

### Level of Theory:

Reference: ROHF  
 Geometry: CCSD(T)-F12a/aug-cc-pVTZ  
 Frequencies: CCSD(T)-F12a/aug-cc-pVTZ  
 Program: MOLPRO 2010.1

### Wavefunction Diagnostics:

$T_1$ : 0.026  
 $D_1$ : 0.118

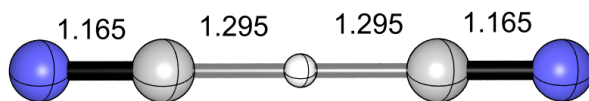

Figure S43: TS (CN + HCN → HCN + CN)

### Cartesian Coordinates (Å):

|   |              |              |               |
|---|--------------|--------------|---------------|
| C | 0.0000000000 | 0.0000000000 | 1.2951575493  |
| N | 0.0000000000 | 0.0000000000 | 2.4604921202  |
| H | 0.0000000000 | 0.0000000000 | 0.0000000006  |
| C | 0.0000000000 | 0.0000000000 | -1.2951575492 |
| N | 0.0000000000 | 0.0000000000 | -2.4604921203 |

Rotational Constants (GHz): 2.4078391, 2.4078391

### Harmonic Vibrational Frequencies (cm<sup>-1</sup>):

|              |      |      |               |     |
|--------------|------|------|---------------|-----|
| $\sigma^+$ : | 2198 | 2156 | 1895 <i>i</i> | 419 |
| $\pi$ :      |      | 829  | 224           | 102 |

### Incremental Focal Point Analysis Table (kcal mol<sup>-1</sup>):

| Basis       | ROHF     | + $\delta$ MP2 | + $\delta$ CCSD | + $\delta$ (T) | + $\delta$ T | + $\delta$ (Q) | Net      |
|-------------|----------|----------------|-----------------|----------------|--------------|----------------|----------|
| aug-cc-pVDZ | +36.50   | -23.34         | +5.79           | -2.60          | +0.32        | -0.33          | [+16.34] |
| aug-cc-pVTZ | +37.45   | -23.58         | +6.42           | -2.79          | [+0.32]      | [-0.33]        | [+17.50] |
| aug-cc-pVQZ | +37.71   | -23.45         | +6.61           | -2.83          | [+0.32]      | [-0.33]        | [+18.04] |
| aug-cc-pV5Z | +37.75   | -23.28         | +6.62           | -2.83          | [+0.32]      | [-0.33]        | [+18.26] |
| CBS LIMIT   | [+37.75] | [-23.09]       | [+6.64]         | [-2.83]        | [+0.32]      | [-0.33]        | [+18.47] |

$$\Delta H_{0K} = \Delta E_{\text{CCSD(T)}/\text{CBS}} + \delta_{\text{ZPVE}} + \delta_{\text{T(Q)}} + \delta_{\text{CORE}} + \delta_{\text{REL}} + \delta_{\text{DBOC}}$$

$$= 18.47 - 2.87 - 0.00 + 0.02 - 0.00 + 0.15 = 15.77 \text{ kcal mol}^{-1}$$

## 4.22 CN + HCN → HNC + CN

### Level of Theory:

Reference: ROHF  
 Geometry: CCSD(T)-F12a/aug-cc-pVTZ  
 Frequencies: CCSD(T)-F12a/aug-cc-pVTZ  
 Program: MOLPRO 2010.1

### Wavefunction Diagnostics:

$T_1$ : 0.033  
 $D_1$ : 0.154

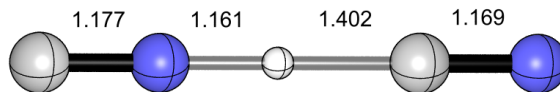

Figure S44: TS (CN + HCN → HNC + CN)

### Cartesian Coordinates (Å):

|   |              |              |               |
|---|--------------|--------------|---------------|
| C | 0.0000000000 | 0.0000000000 | 1.2420848948  |
| N | 0.0000000000 | 0.0000000000 | 2.4106568533  |
| H | 0.0000000000 | 0.0000000000 | -0.1603100495 |
| N | 0.0000000000 | 0.0000000000 | -1.3214007314 |
| C | 0.0000000000 | 0.0000000000 | -2.4988745718 |

Rotational Constants (GHz): 2.5343572, 2.5343572

### Harmonic Vibrational Frequencies (cm<sup>-1</sup>):

|              |       |      |      |     |
|--------------|-------|------|------|-----|
| $\sigma^+$ : | 2827i | 2153 | 2064 | 431 |
| $\pi$ :      |       | 871  | 185  | 62  |

### Incremental Focal Point Analysis Table (kcal mol<sup>-1</sup>):

| Basis       | ROHF     | + $\delta$ MP2 | + $\delta$ CCSD | + $\delta$ (T) | + $\delta$ T | + $\delta$ (Q) | Net      |
|-------------|----------|----------------|-----------------|----------------|--------------|----------------|----------|
| aug-cc-pVDZ | +57.41   | -40.72         | +15.24          | -5.37          | +0.57        | -0.26          | [+26.86] |
| aug-cc-pVTZ | +58.41   | -41.15         | +16.25          | -5.72          | [+0.57]      | [-0.26]        | [+28.10] |
| aug-cc-pVQZ | +58.78   | -41.06         | +16.52          | -5.82          | [+0.57]      | [-0.26]        | [+28.73] |
| aug-cc-pV5Z | +58.85   | -40.90         | +16.57          | -5.84          | [+0.57]      | [-0.26]        | [+28.99] |
| CBS LIMIT   | [+58.86] | [-40.72]       | [+16.62]        | [-5.86]        | [+0.57]      | [-0.26]        | [+29.21] |

$$\Delta H_{0K} = \Delta E_{\text{CCSD(T)}/\text{CBS}} + \delta_{\text{ZPVE}} + \delta_{\text{T(Q)}} + \delta_{\text{CORE}} + \delta_{\text{REL}} + \delta_{\text{DBOC}}$$

$$= 28.90 - 2.81 + 0.31 + 0.04 - 0.08 + 0.02 = 26.37 \text{ kcal mol}^{-1}$$

### 4.23 CN + HNC → HCN + CN

#### Level of Theory:

Reference: ROHF  
Geometry: CCSD(T)-F12a/aug-cc-pVTZ  
Frequencies: CCSD(T)-F12a/aug-cc-pVTZ  
Program: MOLPRO 2010.1

#### Wavefunction Diagnostics:

$T_1$ : 0.033  
 $D_1$ : 0.154

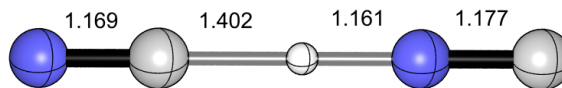

Figure S45: TS (CN + HNC → HCN + CN)

#### Cartesian Coordinates (Å):

|   |              |              |               |
|---|--------------|--------------|---------------|
| C | 0.0000000000 | 0.0000000000 | 1.2420848948  |
| N | 0.0000000000 | 0.0000000000 | 2.4106568533  |
| H | 0.0000000000 | 0.0000000000 | -0.1603100495 |
| N | 0.0000000000 | 0.0000000000 | -1.3214007314 |
| C | 0.0000000000 | 0.0000000000 | -2.4988745718 |

Rotational Constants (GHz): 2.5343572, 2.5343572

#### Harmonic Vibrational Frequencies (cm<sup>-1</sup>):

|              |       |      |      |     |
|--------------|-------|------|------|-----|
| $\sigma^+$ : | 2827i | 2153 | 2064 | 431 |
| $\pi$ :      |       | 871  | 185  | 62  |

#### Incremental Focal Point Analysis Table (kcal mol<sup>-1</sup>):

| Basis       | ROHF     | + $\delta$ MP2 | + $\delta$ CCSD | + $\delta$ (T) | + $\delta$ T | + $\delta$ (Q) | Net      |
|-------------|----------|----------------|-----------------|----------------|--------------|----------------|----------|
| aug-cc-pVDZ | +47.44   | -48.31         | +18.46          | -5.57          | +0.73        | -0.59          | [+12.16] |
| aug-cc-pVTZ | +48.66   | -49.12         | +19.47          | -6.06          | [+0.73]      | [-0.59]        | [+13.08] |
| aug-cc-pVQZ | +49.13   | -49.08         | +19.78          | -6.19          | [+0.73]      | [-0.59]        | [+13.78] |
| aug-cc-pV5Z | +49.19   | -48.97         | +19.84          | -6.22          | [+0.73]      | [-0.59]        | [+13.98] |
| CBS LIMIT   | [+49.20] | [-48.85]       | [+19.90]        | [-6.26]        | [+0.73]      | [-0.59]        | [+14.13] |

$$\Delta H_{0K} = \Delta E_{\text{CCSD(T)/CBS}} + \delta_{\text{ZPVE}} + \delta_{\text{T(Q)}} + \delta_{\text{CORE}} + \delta_{\text{REL}} + \delta_{\text{DBOC}}$$
$$= 13.99 - 2.83 + 0.14 + 0.04 - 0.08 + 0.02 = 11.27 \text{ kcal mol}^{-1}$$



## 4.24 CN + HNC → HNC + CN

### Level of Theory:

Reference: ROHF  
 Geometry: CCSD(T)-F12a/aug-cc-pVTZ  
 Frequencies: CCSD(T)-F12a/aug-cc-pVTZ  
 Program: MOLPRO 2010.1

### Wavefunction Diagnostics:

$T_1$ : 0.016  
 $D_1$ : 0.039

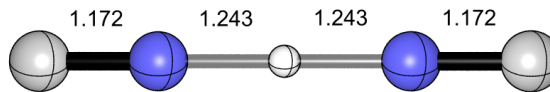

Figure S46: TS (CN + HNC → HNC + CN)

### Cartesian Coordinates (Å):

|   |              |              |               |
|---|--------------|--------------|---------------|
| N | 0.0000000000 | 0.0000000000 | 1.2433472207  |
| C | 0.0000000000 | 0.0000000000 | 2.4156903194  |
| H | 0.0000000000 | 0.0000000000 | -0.0000000002 |
| N | 0.0000000000 | 0.0000000000 | -1.2433472207 |
| C | 0.0000000000 | 0.0000000000 | -2.4156903194 |

Rotational Constants (GHz): 2.7542879, 2.7542879

### Harmonic Vibrational Frequencies (cm<sup>-1</sup>):

|              |       |      |      |     |
|--------------|-------|------|------|-----|
| $\sigma^+$ : | 4232i | 2131 | 2062 | 473 |
| $\pi$ :      |       | 1078 | 198  | 97  |

### Incremental Focal Point Analysis Table (kcal mol<sup>-1</sup>):

| Basis       | ROHF     | + $\delta$ MP2 | + $\delta$ CCSD | + $\delta$ (T) | + $\delta$ T | + $\delta$ (Q) | Net      |
|-------------|----------|----------------|-----------------|----------------|--------------|----------------|----------|
| aug-cc-pVDZ | +51.07   | -51.52         | +21.84          | -6.86          | +1.12        | -1.45          | [+14.20] |
| aug-cc-pVTZ | +52.01   | -52.62         | +23.11          | -7.35          | [+1.12]      | [-1.45]        | [+14.83] |
| aug-cc-pVQZ | +52.53   | -52.73         | +23.41          | -7.48          | [+1.12]      | [-1.45]        | [+15.40] |
| aug-cc-pV5Z | +52.59   | -52.58         | +23.44          | -7.50          | [+1.12]      | [-1.45]        | [+15.63] |
| CBS LIMIT   | [+52.59] | [-52.42]       | [+23.48]        | [-7.53]        | [+1.12]      | [-1.45]        | [+15.80] |

$$\Delta H_{0K} = \Delta E_{\text{CCSD(T)/CBS}} + \delta_{\text{ZPVE}} + \delta_{\text{T(Q)}} + \delta_{\text{CORE}} + \delta_{\text{REL}} + \delta_{\text{DBOC}}$$

$$= 16.13 - 2.08 - 0.33 + 0.06 + 0.00 + 0.07 = 13.85 \text{ kcal mol}^{-1}$$
